# 1 Sexually dimorphic activation of innate antitumour immunity prevents adrenocortical 2 carcinoma development

3

4

5 James J Wilmouth JR<sup>1#</sup>, Julie Olabe<sup>1#</sup>, Diana Garcia-Garcia<sup>1</sup>, Cécily Lucas<sup>1</sup>, Rachel Guiton<sup>1</sup>,  
6 Florence Roucher-Boulez<sup>1,2,3</sup>, Damien Dufour<sup>1</sup>, Christelle Damon-Soubeyrand<sup>1</sup>, Isabelle Sahut-  
7 Barnola<sup>1</sup>, Jean-Christophe Pointud<sup>1</sup>, Yoan Renaud<sup>1</sup>, Adrien Levasseur<sup>1</sup>, Igor Tauveron<sup>1,4</sup>,  
8 Anne-Marie Lefrançois-Martinez<sup>1</sup>, Antoine Martinez<sup>1</sup> and Pierre Val<sup>1\*</sup>

9

10 1- Institut GReD (Genetics, Reproduction and Development), CNRS UMR 6293, Inserm  
11 U1103, Université Clermont Auvergne, 28 Place Henri Dunant 63000 Clermont-Ferrand,  
12 France

13 2- Laboratoire de Biochimie et Biologie Moléculaire, UM Pathologies Endocriniennes,  
14 Groupement Hospitalier Est, Hospices Civils de Lyon, Bron, France

15 3- Univ Lyon, Université Claude Bernard Lyon 1, Lyon, France

16 4- Endocrinologie Diabétologie CHU Clermont Ferrand 58 rue Montalembert F63000  
17 Clermont Fd France

18

19

20 # These authors contributed equally to this work

21 \* Lead author, to whom correspondence should be addressed ([pierre.val@uca.fr](mailto:pierre.val@uca.fr))

22

## 23 Summary

24

25 In contrast with most cancers, adrenocortical carcinomas (ACC) are more frequent in women  
26 than men, but the underlying mechanisms of this sexual dimorphism remain elusive.  
27 Homozygous deletion of the negative WNT pathway regulator *ZNRF3* is the most frequent  
28 alteration in ACC patients. Here, we show that Cre-mediated inactivation of *Znrf3* in  
29 steroidogenic cells of the mouse adrenal cortex is associated with sexually dimorphic tumour  
30 progression. Indeed, although most knockout female mice develop metastatic carcinomas over  
31 an 18 month-time course, adrenal hyperplasia gradually regresses in male knockout mice. This  
32 male-specific regression is associated with induction of senescence and recruitment of  
33 macrophages, which differentiate as active phagocytes that clear-out senescent preneoplastic  
34 cells. Macrophage recruitment is also observed in female mice. However, it is delayed and  
35 dampened compared to males, which allows for tumour progression. Interestingly, testosterone  
36 treatment of female knockouts is sufficient to induce senescence, recruitment of phagocytic  
37 macrophages and regression of hyperplasia. We further show that although macrophages are  
38 present within adrenal tumours at 18 months, MERTK<sup>high</sup> active phagocytes are mostly found  
39 in indolent lesions in males but not in aggressive tumours in females. Consistent with our  
40 observations in mice, analysis of RNA sequencing data from the TCGA cohort of ACC shows  
41 that phagocytic macrophages are more prominent in men than women and associated with better

42 prognosis. Altogether, these data establish that phagocytic macrophages prevent aggressive  
43 ACC development in male mice and suggest that they may play a key role in the unusual sexual  
44 dimorphism of ACC in patients.

45

46 **Keywords:** sexual dimorphism, cancer, macrophages, antitumour immunity, phagocytosis,  
47 senescence, senescence associated secretory phenotype, adrenocortical carcinoma, androgens,  
48 ZNRF3, WNT signalling

49

50

## 51 **Introduction**

52

53 Apart from reproductive tissues, cancer incidence and mortality are higher in males than  
54 females<sup>1,2</sup>. Adrenocortical carcinoma (ACC), which arises from steroidogenic cells of the  
55 adrenal cortex is one of the rare exceptions to this rule. Indeed, ACC female-to-male ratios  
56 range from 1.5 to 2.5:1 and women are generally diagnosed at a younger age (Fig S1A)<sup>3-7</sup>.

57 Although the higher rate of steady state proliferation and more efficient adrenal cortex renewal  
58 in females<sup>5,8,9</sup> may play a role in sexually dimorphic tumorigenesis, the mechanisms underlying  
59 female prevalence of ACC remain elusive.

60

61 ACC is an aggressive cancer, with half of the patients presenting with metastatic disease at  
62 diagnosis. Overall, 5 year survival rates range between 16 and 47% and decrease to around 10%  
63 for metastatic patients<sup>10</sup>. In line with the steroidogenic activity of the adrenal cortex, ACC is  
64 associated with hormonal hypersecretion in more than 50% of patients<sup>11</sup>. A vast majority of  
65 secreting ACC produce excess glucocorticoids, but some tumours also produce sex steroids or  
66 a combination of both<sup>12</sup>.

67

68 Radical surgical resection of ACC is the most effective therapeutic strategy for localized  
69 tumours, but the risk of recurrence remains high<sup>12</sup>. In patients with advanced inoperable or  
70 metastatic ACC, the adrenolytic compound mitotane, a derivate of the insecticide DDT, remains  
71 the standard of care, used as a single agent or in combination with an etoposide-doxorubicin-  
72 platinum polychemotherapy<sup>13-15</sup>. Although these treatments can improve recurrence free survival,  
73 their benefit on overall survival is still debated<sup>12,13,16-18</sup>. Several phase I/II clinical trials of  
74 immune checkpoint inhibitors targeting PD1 and PD-L1, have also been conducted in ACC  
75 patients<sup>19-22</sup>. Unfortunately, these were associated with low response rates and have failed to

76 improve patient outcome significantly. One potential reason for these modest results is the low  
77 level of lymphocyte infiltration in ACC<sup>23</sup>, which seems associated with local production of  
78 glucocorticoids<sup>24</sup>.

79

80 Understanding the molecular underpinnings of ACC pathogenesis is thus of utmost importance  
81 to develop novel therapeutic approaches. Large scale pan-genomic studies have identified  
82 homozygous deletion of *ZNRF3* as the most frequent genetic alteration in ACC<sup>25,26</sup>. This gene  
83 encodes a membrane E3 ubiquitin-ligase that inhibits WNT signalling by inducing  
84 ubiquitination and degradation of Frizzled receptors<sup>27,28</sup>. We previously showed that  
85 conditional ablation of *Znrf3* within steroidogenic cells of the adrenal cortex, resulted in  
86 moderate WNT pathway activation and adrenal zona fasciculata hyperplasia up to 6 weeks,  
87 suggesting that ZNRF3 was a potential tumour suppressor in the adrenal cortex<sup>29</sup>. However,  
88 we did not evaluate later stages of tumour progression.

89

90 Here, we show that tumour progression following ablation of *Znrf3* within steroidogenic cells  
91 of the adrenal cortex is sexually dimorphic. Whereas most female mice develop full-fledged  
92 metastatic carcinomas over an 18 month-time course, adrenal hyperplasia gradually regresses  
93 in male knockout mice. We show that male-specific regression of hyperplasia is associated with  
94 induction of senescence, recruitment of macrophages and differentiation of active phagocytes  
95 that clear out senescent steroidogenic cells. Although some degree of macrophage recruitment  
96 is observed in female mice, it is delayed and dampened compared to males, which allows for  
97 tumour progression. This phenomenon is dependent on androgens and can be triggered by  
98 testosterone treatment in females. Interestingly, even though macrophages are present within  
99 adrenal tumours at 18 months, active phagocytes, characterised by expression of the TAM  
100 receptor MERTK are mostly found in males but not females. Consistent with our observations  
101 in mice, analysis of RNA sequencing data from the TCGA cohort of ACC shows that  
102 phagocytic macrophages are more prominent in men than women and associated with better  
103 prognosis. Altogether, these data establish that phagocytic macrophages prevent aggressive  
104 ACC development in male mice and suggest that they may play a key role in the unusual sexual  
105 dimorphism of ACC in patients.

106

107 **Results**

108

## 109 **Sexually dimorphic tumour progression in *Znrf3* cKO adrenals**

110 We previously showed that adrenal targeted ablation of *Znrf3* resulted in massive zona  
111 fasciculata hyperplasia at 6 weeks of age, but we did not evaluate the phenotype at later stages<sup>29</sup>.  
112 To gain further insight into the potential tumour suppressor function of ZNRF3 in the adrenal  
113 cortex, we conducted a kinetic analysis from 4 to 78 weeks (Fig 1). In female *Znrf3* cKO mice  
114 (ZKO), adrenal weight increased progressively from 4 to 6 weeks and plateaued from 9 to 24  
115 weeks. By 52 weeks, *Znrf3* cKO average adrenal weight was still significantly increased and  
116 some adrenals were massively enlarged with weights up to 534mg. This trend was further  
117 amplified at 78 weeks with a majority of female *Znrf3* cKO adrenals showing over a 10-fold  
118 increase in weight compared to controls (Fig 1A). This suggested malignant transformation of  
119 adrenals over time. Consistent with this idea, introduction of the mTmG reporter in the breeding  
120 scheme allowed identification of multiple micro and macro-metastases in the local lymph  
121 nodes, peritoneal cavity, liver and lungs of 75% of female *Znrf3* cKO mice at 78 weeks (Fig 1B  
122 and Fig S1B). Histological analysis of adrenals that were associated with metastatic  
123 development (Fig 1C) showed complete disorganisation of the cortex that was mostly composed  
124 of densely packed small basophilic cells. This was associated with a significant increase in Ki67  
125 labelling index (Fig 1C & D), although proliferation was rather heterogeneous throughout the  
126 tumour with areas showing up to 25% Ki67 labelling (Fig S1C). In contrast, in the few mutant  
127 mice where no metastases were found at 78 weeks (indolent ZKO), adrenals were largely  
128 hyperplastic, but cells retained a relatively normal morphology and Ki67 labelling was similar  
129 to control (Fig 1C). Altogether, these data suggested that ZNRF3 behaved as a classical tumour  
130 suppressor in female mice, its ablation resulting in a high frequency of aggressive  
131 adrenocortical carcinoma formation at 78 weeks. In sharp contrast, although male *Znrf3* cKO  
132 adrenals were also larger at 4 and 6 weeks, adrenal weight steadily declined thereafter, almost  
133 returning to normal at 78 weeks (Fig 1E). This was associated with lack of metastatic  
134 progression (Fig 1F), benign histology and low Ki67 labelling index (Fig 1G & H), although  
135 some patches of higher proliferation could be detected in some adrenals (Fig S1C). This  
136 suggested that overall tumour development was rapidly blunted in males, although the initial  
137 hyperplastic phase was equivalent to females.

138 To further gain insight into this sexually dimorphic phenotype, we evaluated proliferation from  
139 4 to 52 weeks. Analysis of Ki67 labelling index showed that following an early significant  
140 increase, both males and females had a rapid arrest in proliferation at 6 weeks (Fig 1I & Fig  
141 S1D). This remained at low levels up to 52 weeks, although male adrenals displayed a mild but  
142 significant rebound at this stage (Fig 1I). The steady decline in adrenal weight, although



143 proliferation in male knockout adrenals was comparable to controls after 4 weeks, suggested  
144 that an active mechanism counteracted tumour progression in males. Surprisingly though, there  
145 was no increase in apoptosis, measured by cleaved caspase 3 staining, in either female or male  
146 adrenals at 6 and 12 weeks (Fig S1E). To try to further understand the sexually dimorphic  
147 phenotype, we conducted a careful kinetic evaluation of adrenal histology. This showed a  
148 similar hyperplastic phenotype in males and females at 4 and 6 weeks (Fig 1J). Hyperplasia  
149 progressed in females with accumulation of small basophilic cells that composed most of the  
150 gland by 52 weeks (Fig 1J). Strikingly, starting at 12 weeks, we observed progressive thinning  
151 of the cortex (eosinophilic cells) and concomitant appearance and expansion of multinucleated  
152 giant cells (MGCs containing up to 12 nuclei per cell) that progressively took over a large  
153 proportion of the male *Znrf3 cKO* gland (up to 40%) (Fig 1J). In females some MGCs were also  
154 observed. However, they were first visible at 24 weeks and only represented a small proportion  
155 of the gland, even at 52 weeks (Fig 1J). Interestingly, MGCs were reminiscent of fused  
156 macrophages that are observed in granulomatous inflammatory diseases, which suggested a  
157 potential involvement of innate immune cells in preventing tumour progression in male *Znrf3*  
158 *cKO* adrenals.

159

### 160 **Regression in male *Znrf3 cKO* adrenals is correlated with macrophage infiltration and** 161 **fusion**

162 To further gain insight into the underpinnings of the regression phenomenon, we analysed  
163 global gene expression by bulk RNA sequencing of control and *Znrf3 cKO* male adrenals at 4,  
164 6 and 12 weeks. Gene set enrichment analysis (GSEA) of the RNA sequencing data using the  
165 C5 Gene Ontology database (MSigDB) showed that at 12 weeks, the 34 most significantly  
166 enriched gene sets were all related with immune response and inflammation (Fig 2A). Most of  
167 these gene sets were either not (FDR >0.05) or negatively enriched at 4 weeks and showed an  
168 intermediate enrichment score at 6 weeks. This suggested that ablation of *Znrf3* resulted in the  
169 progressive establishment of a proinflammatory environment. Consistent with this idea, a large  
170 number of proinflammatory cytokines and chemokines genes were progressively upregulated  
171 at 6 and 12 weeks (Fig 2B and Fig S2A). Establishment of an inflammatory environment was  
172 further evaluated by immunohistochemistry for the pan leukocyte marker CD45. In control  
173 male adrenals, a few CD45-positive cells were found scattered throughout the cortex. Four-  
174 week-old male *Znrf3 cKO* adrenals were quite similar to controls, although more  
175 mononucleated leukocytes were present in the inner cortex. At 6 and 12 weeks, the number of  
176 CD45 positive cells dramatically increased in KO adrenals (Fig 2C and Fig S2B). These

177 comprised both mononuclear cells (stars) and the multinucleated giant cells (arrowheads) that  
178 accumulated in the inner cortex (Fig 2C). To further identify the immune cell types that  
179 composed the infiltrate, we deconvoluted RNA sequencing data with CibersortX using immune  
180 cell signatures from ImmuCC (Fig 2D) and mMCP (Fig S2C). Both approaches showed a  
181 significant increase in macrophages populations, which represented 63% of all immune  
182 populations at 12 weeks. This was further confirmed by GSEA, showing a highly significant  
183 positive enrichment of multiple macrophages signatures at 12 weeks (Fig 2E) and by RTqPCR  
184 showing a progressive accumulation of the macrophage marker transcripts *Cd68*, *Adgre1* and  
185 *Cd11b* (Fig S2D). Altogether, these data strongly suggested that regression of adrenal cortex  
186 hyperplasia in *Znrf3 cKO* males was associated with establishment of a proinflammatory  
187 environment and massive recruitment of macrophages.

188 To further confirm the nature of infiltrating cells, adrenals from control and *Znrf3 cKO* males  
189 were dissociated and analysed by flow cytometry (Fig 2F and Fig S2E). In wild-type adrenals,  
190 CD64<sup>+</sup>/F4/80<sup>+</sup> macrophages represented ~30 to 36% of all live CD45<sup>+</sup> cells at 4 and 6 weeks.  
191 In *Znrf3 cKO* adrenals, this proportion was significantly increased up to ~49%-54% at these  
192 two stages, demonstrating increased macrophage infiltration as early as 4 weeks. Flow  
193 cytometry analyses further showed that at 4 weeks, almost 80% of CD45<sup>+</sup>/CD64<sup>+</sup> macrophages  
194 co-expressed the M1 markers CD38 and MHC-II, together with the M2 marker CD206, both in  
195 wild-type and *Znrf3 cKO* adrenals (Fig S3A). Although there was a very mild but significant  
196 increase in both MHC-II<sup>+</sup>/CD206<sup>+</sup> and CD38<sup>+</sup>/CD206<sup>+</sup> double-positive macrophages in 6-week  
197 *Znrf3 cKO* adrenals, there was no significant difference in either M1 or M2 macrophages  
198 proportions, following ablation of *Znrf3* at the two analysed stages (Fig S3A). RTqPCR (Fig  
199 S3B) and RNA sequencing analyses (Fig S3C-D) further confirmed deregulation of both M1  
200 and M2 markers in *Znrf3cKO* adrenals, indicating that infiltrating macrophages had mixed M1  
201 and M2 characteristics at 4 and 6 weeks.

202 Unfortunately, the majority of CD45<sup>+</sup> MGCs that accumulated from 12 weeks onward, had a  
203 cell diameter larger than 40 µm, which precluded their characterisation by flow cytometry (Fig  
204 S4A). To further characterise immune infiltration during the regression period, we thus resorted  
205 to immunohistochemical analysis. Staining with pan-macrophages markers IBA-1 and F4/80  
206 confirmed progressive infiltration from 4 to 12 weeks (Fig 2G). Interestingly, although  
207 mononuclear cells appeared equivalently labelled by both IBA-1 and F4/80, IBA-1 staining of  
208 MGCs was weak compared to F4/80 (Fig 2G). However, MGCs displayed high levels of  
209 cytoplasmic CD68 staining, suggesting that they were derived from the fusion of mononuclear  
210 macrophages (Fig 2G). Macrophage fusion has been shown to rely on TREM2, an activating

211 receptor of the Ig-superfamily and on TYROBP/DAP12, its transmembrane signalling adaptor  
212 <sup>30,31</sup>. Interestingly, expression of *Trem2* and *Tyrobp/Dap12* was strongly increased in RTqPCR  
213 at 12 weeks (Fig S4B) and IHC analyses showed a strong up-regulation of both TREM2 and  
214 TYROBP protein accumulation in MGCs (Fig 2H). High magnification images further showed  
215 TREM2/TYROBP-positive mononuclear macrophages actively fusing with MGCs (Fig 2I,  
216 arrowheads).

217 Altogether, this suggested that *Znrf3* ablation in steroidogenic cells resulted in macrophage  
218 infiltration and fusion to form MGCs in male adrenals.

219

### 220 **Infiltrating macrophages actively phagocytose steroidogenic cells**

221 Macrophages have been suggested to play a role in the early response to oncogenic insult, by  
222 clearing out preneoplastic cells<sup>7,32</sup>. Interestingly, GSEA of RNA sequencing data showed a  
223 progressive significant enrichment of gene sets associated with phagocytosis and clearance of  
224 apoptotic cells in male *Znrf3 cKO* adrenals, suggesting a potential role of phagocytosis in  
225 regression of hyperplasia (Fig 3A). Phagocytosis involves chemotaxis of macrophages towards  
226 target cells that express “find-me” signals and recognition of target cells through “eat-me”  
227 signals that can be received directly by phagocytic receptors, or indirectly after opsonization.  
228 Detailed analysis of RNA sequencing data showed significant up-regulation of genes coding  
229 the potential “find-me” chemokine CX3CL1<sup>33</sup>, and of the GPR132/G2A and P2RY2/P2RY6  
230 metabotropic receptors that recognize lysophosphatidylcholine (GPR132)<sup>34</sup> and nucleotides  
231 (P2RY2/P2RY6)<sup>35</sup>, released by target cells (Fig 3B). Among potential “eat-me” signals, we  
232 found significant overexpression of C1Q complement components *Clqa*, *Clqb* and *Clqc* which  
233 have been shown to decorate the surface of apoptotic cells to target them for phagocytosis<sup>35,36</sup>  
234 (Fig 3B), and of *Slamf7*, which is involved in phagocytosis of hematopoietic tumour cells<sup>37</sup>.  
235 There was also upregulation of the gene coding MFGE8, which opsonizes apoptotic cells and  
236 is recognised by the integrin receptors  $\alpha_v\beta_3$  and  $\alpha_v\beta_5$  at the membrane of macrophages<sup>38,39</sup> (Fig  
237 3B & 3C). Interestingly, TREM2 and TYROBP, which we found overexpressed both at the  
238 mRNA and protein level (Fig 2G, Fig 3B & Fig S4B), can also be involved in the phagocytic  
239 process through recognition of lipids and ApoE-opsonized cells<sup>38,40,41</sup>. Among the three TAM  
240 receptor tyrosine kinases, which play a central role in phagocytosis (TYRO3, MERTK,  
241 AXL)<sup>35,42</sup>, *Mertk* was expressed at high levels and showed the most significant upregulation in  
242 *Znrf3 cKO* adrenals (Fig 3B & C). Although there was no upregulation of *Gas6* and *Pros1*, the  
243 natural TAM receptors ligands<sup>35</sup>, there was a strong overexpression of *Lgals3* (27-fold), which

244 encodes Galectin-3, a phosphatidylserine-independent MERTK-specific opsonin<sup>38,43</sup> (Fig 3B).  
245 This was further confirmed by RTqPCR (Fig 3C), suggesting that engagement of MERTK by  
246 Galectin-3 may trigger phagocytosis of *Znrf3 cKO* hyperplastic steroidogenic cells.  
247 To further gain insight into a potential phagocytic process in *Znrf3 cKO* adrenals, we analysed  
248 expression of the TAM receptor MERTK by IHC. Although some positive cells were found in  
249 wild-type adrenals, they were rather scarce and expressed low levels of MERTK (Fig 3D). In  
250 contrast, increased numbers of mononuclear MERTK<sup>high</sup> cells were found in *Znrf3 cKO*  
251 adrenals as early as 6 weeks (Fig 3D). Most of these cells also stained for IBA-1, confirming  
252 their macrophage identity (Fig S4C). At 6 and 12 weeks, the number of mononuclear MERTK-  
253 high cells dramatically increased in *Znrf3 cKO* (Fig3D & Fig S4C). Interestingly,  
254 multinucleated fused macrophages expressed very high levels of MERTK (Fig 3D), which was  
255 associated with reduced IBA-1 expression (Fig S4C). MERTK<sup>high</sup> and in particular, fused  
256 macrophages, were also positive for TREM2 (Fig S4D). However, TREM2 was expressed in a  
257 larger number of macrophages, including mononucleated MERTK<sup>-</sup> macrophages (Fig S4D).  
258 Altogether, this suggested that macrophages infiltration in *Znrf3 cKO* male adrenals was  
259 associated with differentiation into active phagocytes.  
260 To test this hypothesis, we evaluated phagocytosis by confocal microscopy. For this, we  
261 colocalised expression of 3 $\beta$ HSD and SF-1, two markers of steroidogenic cells with IBA-1  
262 (from 4 to 9 weeks) and MERTK (at 12 weeks). We then counted 3 $\beta$ HSD and SF-1 positive  
263 cells that were found within the boundaries of IBA-1<sup>+</sup> or MERTK<sup>high</sup> macrophages throughout  
264 the confocal Z-stack (Fig 3E). A few IBA-1<sup>+</sup> macrophages contained 3 $\beta$ HSD positive cells in  
265 control adrenals at 4, 6 and 9 weeks, indicating that phagocytosis of steroidogenic cells was  
266 taking place at homeostasis in the adrenal (Fig 3E). Interestingly, the number of phagocytic  
267 IBA-1<sup>+</sup> cells was markedly increased in *Znrf3 cKO* adrenals at these three timepoints (Fig 3E),  
268 indicating that mononuclear IBA-1<sup>+</sup> macrophages were actively involved in phagocytosis of  
269 *Znrf3 cKO* steroidogenic cells. Increased phagocytosis was also observed for MERTK<sup>high</sup>  
270 macrophages at 12 weeks (Fig 3F).  
271 Altogether, these data show that both IBA-1<sup>+</sup> and MERTK<sup>high</sup> macrophages are involved in a  
272 dramatic increase in phagocytosis of mutant steroidogenic cells in male *Znrf3 cKO* adrenals.  
273 To further confirm the key role of macrophages in regression of adrenal hyperplasia, we  
274 depleted macrophages using a diet enriched with 290mg/kg Pexidartinib, a pharmacological  
275 inhibitor of CSF1R. This tyrosine kinase receptor plays a central role for survival of  
276 macrophages within their tissue niches, through stimulation by CSF1 and/or IL-34. Consistent

277 with the key function of CSF1R, flow cytometry analyses showed that 1 week of pexidartinib  
278 chow was sufficient to deplete almost all CD45<sup>+</sup>/CD64<sup>+</sup>/F4/80<sup>+</sup> macrophages within the adrenal  
279 cortex of control male mice (Fig S4E). We then evaluated the impact of macrophages depletion  
280 in male *Znrf3 cKO* mice by feeding them with standard chow or Pexidartinib chow from 3 to  
281 12 weeks (Fig 3G). This resulted in a very strong decrease in the number of IBA-1<sup>+</sup> (Fig S4F)  
282 and MERTK<sup>high</sup> macrophages (Fig 3G) in IHC analyses. Consistent with these findings, H&E  
283 staining showed a remarkable decrease in the number of fused macrophages and concomitant  
284 expansion of presumptive eosinophilic steroidogenic cells (Fig 3G). This was further confirmed  
285 by a significant increase in SF-1 positive cells in the cortices of pexidartinib-treated mice (Fig  
286 3G) and an inverse correlation between MERTK-positive and SF-1-positive cells (Fig S4G).  
287 Altogether, these data show that *Znrf3* ablation induces sustained recruitment of IBA1<sup>+</sup> and  
288 MERTK<sup>high</sup> macrophages, which results in phagocytic clearance of mutant steroidogenic cells  
289 and regression of adrenal hyperplasia in male mice.

290

### 291 **Recruitment of phagocytic macrophages is delayed in females**

292 In contrast with males, female *Znrf3 cKO* adrenals progress from hyperplasia at 4 weeks to  
293 development of full-fledged metastatic carcinomas at 78 weeks (Fig 1). Interestingly, analysis  
294 of the overall mononuclear macrophage population by IHC for IBA-1, showed increased  
295 recruitment of IBA-1-positive macrophages in *Znrf3 cKO* females from 4 to 52 weeks (Fig 4A).  
296 However, counting of IBA-1-positive cells suggested that macrophages recruitment was milder  
297 than in males from 4 to 12 weeks (Fig 4A&B). This was confirmed by GSEA (Fig 4C), showing  
298 a robust enrichment in macrophages signatures in male knockouts compared with female  
299 knockouts at 12 weeks and RTqPCR analyses of *Cd68*, *Adgre1* and *Cd11b* (Fig S5A). Milder  
300 inflammatory response in female knockouts was also confirmed by the absence of cytokine  
301 signature enrichment at 12 weeks, compared with male knockouts (Fig 4D). By 24 and up to  
302 52 weeks, the number of IBA-1-positive cells significantly increased in female *Znrf3 cKO*  
303 adrenals, which was accompanied by a mild but significant increase in mRNA accumulation of  
304 *Adgre1* at 24 weeks and *Cd68* at 52 weeks (Fig 4A-B & Fig S5A). However, this was still not  
305 associated with enrichment of cytokines (Fig S5B). Altogether, this showed that macrophage  
306 recruitment was delayed in female *Znrf3 cKO* adrenals and was not associated with robust  
307 inflammation. In males, regression of hyperplasia is associated with fusion of mononuclear  
308 macrophages to form MGCs (Fig 3). Whereas fused macrophages were already present in large  
309 numbers in 12 weeks *Znrf3 cKO* males, they did not appear before 24 weeks in females (Fig  
310 4E). Consistent with delayed fusion, fused macrophages harboured less nuclei (Fig S5C) and



311 were smaller than in males at this stage (Fig S5D). In male *Znrf3 cKO* adrenals, acquisition of  
312 high phagocytic capacities is associated with infiltration of MERTK<sup>high</sup> macrophages as early  
313 as 6 weeks (Fig 3D & Fig 4G). In contrast, these were scarce until 24 weeks in female *Znrf3*  
314 *cKO* adrenals (Fig 4F-G). They mostly represented fused macrophages (Fig 4F) and were only  
315 significantly increased in numbers at 52 weeks (Fig 4G). This suggested that phagocytosis of  
316 hyperplastic mutant cells may be impaired in female knockouts. Indeed, although there was  
317 trend for increased phagocytosis by IBA-1<sup>+</sup> macrophages, it did not reach significance, from 4  
318 to 9 weeks (Fig 4H). Furthermore, the rate of phagocytosis was much lower than in males,  
319 barely reaching 12 events per high power field in female knockouts, compared with over 40 in  
320 male knockouts (Fig 3E). The low phagocytic capacity in females was even more evident when  
321 analysed within MERTK<sup>high</sup> macrophages at 12 weeks (Fig 4H). This was supported by the  
322 lack of enrichment of phagocytosis-related gene signatures at any time point (Fig 4I), which  
323 was further confirmed by RTqPCR at 12 weeks (Fig 4J).

324 Altogether, these data strongly suggest that delayed recruitment and impaired function of  
325 phagocytic macrophages allows progression of hyperplasia in *Znrf3 cKO* females.

326

### 327 **Androgens are sufficient to trigger early recruitment of phagocytic macrophages and** 328 **regression of hyperplasia**

329 Sexually dimorphic phenotypic differences in phagocytic macrophage recruitment and  
330 regression of hyperplasia occur between 6 and 12 weeks, which coincides with onset of puberty  
331 in mice. To evaluate a potential contribution of androgens to this phenomenon, *Znrf3 cKO*  
332 females were implanted with placebo or testosterone pellets from 4 to 12 weeks and their  
333 adrenals were then harvested (Fig 5A). As expected, placebo treated female adrenals were  
334 almost completely devoid of MERTK<sup>high</sup> macrophages (Fig 5B-C). In sharp contrast,  
335 testosterone-treated females displayed massive infiltration of both mononuclear and fused  
336 MERTK<sup>high</sup> macrophages, which was almost equivalent to 12-week-old males (Fig 5B-C).  
337 Infiltration of macrophages was further confirmed by RTqPCR showing increased expression  
338 of *Cd68*, *Adgre1* and *Cd11b*, following androgen treatment (Fig 5D). Interestingly, RTqPCR  
339 analysis of phagocytosis-associated gene expression also showed increased accumulation of  
340 *Axl*, *Mertk*, *Mfge8*, *Trem2*, *Tyrobp* and *Lgals3*, suggesting that testosterone treatment stimulated  
341 recruitment of phagocytic macrophages (Fig 5E). Consistent with this hypothesis, testosterone  
342 treatment was associated with a marked decrease in *Znrf3 cKO* female adrenal weight, which  
343 returned to control levels (Fig 5F). Altogether, these experiments show that androgens are



344 sufficient to induce recruitment of phagocytic macrophages, which results in regression of  
345 hyperplasia.

346

347 **Recruitment of phagocytic macrophages in male *Znrf3* cKO mice is associated with**  
348 **sexually dimorphic induction of senescence**

349 Recruitment of myeloid cells to preneoplastic lesions has been associated with induction of  
350 senescence<sup>7,32</sup>. To evaluate a potential role of senescence in the sexually dimorphic recruitment  
351 of phagocytes in the adrenal cortex of *Znrf3* cKO mice, we evaluated enrichment of senescence-  
352 associated signatures in males and females from 4 to 12 weeks. Whereas most of these  
353 signatures were significantly enriched in *Znrf3* cKO males at 6 and 12 weeks, there was no or  
354 negative enrichment in females (Fig 6A). This suggested that ablation of *Znrf3* resulted in male-  
355 specific induction of senescence. To further evaluate this hypothesis, we first analysed  
356 expression of the cell-cycle inhibitor p21. In these experiments, steroidogenic cells were  
357 labelled by GFP, which was expressed by the mTmG locus following SF-1:Cre-mediated  
358 recombination. Consistent with induction of senescence, there was a significant increase in p21  
359 labelling-index within GFP<sup>+</sup> steroidogenic cells in *Znrf3* cKO males at 4 weeks (Fig 6B and  
360 S6A-B). Levels of P21<sup>+</sup> cells accumulation returned to normal at 6 weeks in *Znrf3* cKO males  
361 and were significantly reduced at 12 weeks, consistent with phagocytosis of senescent cells (Fig  
362 6B). Surprisingly, a significant increase in P21 labelling was also observed in *Znrf3* cKO  
363 females at 4 weeks and maintained up to 12 weeks (Fig 6B and S6B). This suggested that cell  
364 cycle was arrested in both males and females, following *Znrf3* ablation. To further assess  
365 induction of senescence, we analysed activity of the prototypic senescence-associated acidic  $\beta$ -  
366 galactosidase (SA- $\beta$ Gal). This showed a few positive cells in the subcapsular area and at the  
367 cortical-medullary junction in control males and females, which was further increased in control  
368 females at 12 weeks. This suggested that spontaneous senescence was taking place in these  
369 regions (Fig 6C). Strikingly, SA- $\beta$ Gal staining was increased within the inner cortex of male  
370 *Znrf3* cKO mice at 6 weeks and to a lesser extent at 12 weeks, consistent with phagocytic  
371 clearance of senescent cells in male adrenals (Fig 6C). In contrast, there was no increase in SA-  
372  $\beta$ Gal staining in *Znrf3* cKO females, which displayed a similar pattern to controls (Fig 6C).  
373 This suggested that although proliferation was arrested in both males and females, senescence  
374 was only induced in male *Znrf3* cKO adrenals. To further confirm this, we evaluated expression  
375 of a senescence associated secretory phenotype (SASP) in our RNA sequencing data. This  
376 analysis showed that the 23 SASP-coding genes that were significantly deregulated in 12-week-

377 old *Znrf3 cKO* male adrenals were not deregulated in females (Fig 6D), suggesting that  
378 establishment of a SASP was male-specific. This was further confirmed by RTqPCR analyses  
379 showing significant up-regulation of *Mmp12* and *Il1a* at 6 weeks and *Cxcl2*, *Mmp12*, *Il1a* and  
380 *Tnfrsf1b* at 12 weeks in male, but not female adrenals (Fig 6E & Fig S6C), as well as male-  
381 specific enrichment of gene sets for NFkB signalling, which plays a key role in SASP  
382 induction<sup>44,45</sup> (Fig S6D). Interestingly, *Znrf3 cKO* female mice that received testosterone (Fig  
383 5) also showed induction of senescence-associated  $\beta$ -galactosidase after 1 week of treatment  
384 (from 4 to 5 weeks, Fig 6F). This was associated with up-regulation of the SASP factors  
385 *Mmp12*, *Il1a* and *Tnfrsf1b* (Fig 6G), which was concomitant with recruitment of MERTK<sup>high</sup>  
386 macrophages and regression of hyperplasia after testosterone treatment from 4 to 12 weeks (Fig  
387 5). This suggested that testosterone played a key role in senescence induction, which in turn,  
388 allowed recruitment of macrophages through SASP factors. Consistent with this hypothesis,  
389 F4/80-positive macrophages were found in very close proximity to SA- $\beta$ Galactosidase- and  
390 GFP-positive steroidogenic cells in the adrenal cortex of male *Znrf3 cKO* mice at 6 weeks (Fig  
391 6H).

392

393 Altogether, these data strongly suggest that male-specific androgen-driven induction of  
394 senescence and SASP, results in recruitment, activation and fusion of highly efficient  
395 phagocytes that prevent tumour progression in male *Znrf3 cKO* mice.

396

### 397 **Aggressive tumourigenesis is associated with infiltration of non-phagocytic macrophages** 398 **in female adrenals**

399 To further gain insight into the role of macrophages at late stages of tumourigenesis, we  
400 evaluated infiltration of macrophages in 78-week-old adrenal lesions in both male and female  
401 mice. At this stage, male *Znrf3 cKO* adrenals were still infiltrated by IBA-1-positive  
402 macrophages that were scattered throughout the cortex (Fig 7A). However, quantification of  
403 the IBA-1 index showed that in contrast with earlier stages, infiltration was equivalent to control  
404 males (Fig 7B). In female *Znrf3 cKO*, IBA-1-positive infiltration was somewhat heterogenous  
405 within the tissue, with areas of high infiltration and zones that were almost devoid of  
406 macrophages (Fig 7A). There was also interindividual heterogeneity. Indeed, some tumours  
407 were still infiltrated at levels comparable to controls, whereas others showed much less IBA-1-  
408 positive cells or virtually no macrophages (Fig 7A & B). There was no overall difference  
409 between indolent and aggressive (metastatic) tumours with respect to IBA-1 index (Fig 7B).

410 However, macrophages exclusion was only observed in a subset of 2/10 aggressive tumours  
411 (Fig 7A & B). Consistent with IHC analyses, accumulation of mRNA encoding macrophages  
412 markers were unaltered (*Cd68*, *Adgre1*) or decreased (*Cd11b*) in female *Znrf3 cKO* compared  
413 to controls (Fig 7C). Interestingly, although accumulation of *Adgre1* and *Cd11b* mRNA was  
414 unaltered, *Cd68* was still strongly accumulated in male *Znrf3 cKO* adrenals (Fig 7C). Since we  
415 showed high expression of CD68 in fused macrophages at earlier stages (Fig 2G), this suggested  
416 that active phagocytes may still be accumulating in male KO adrenals at 78 weeks. Consistent  
417 with this idea, there were still large numbers of MERTK<sup>high</sup> fused macrophages in 78-week-old  
418 *Znrf3 cKO* male adrenals (Fig 7A & B), which was correlated with overexpression of *Mfge8*,  
419 *Trem2* and *Tyrobp* in qPCR (Fig 7D). In contrast, female *Znrf3 cKO* adrenals showed scarce  
420 infiltration of MERTK<sup>high</sup> fused macrophages, although a few of them could still be observed  
421 in indolent tumours (Fig 7A & B). Consistent, with these observations, there was no  
422 deregulation of phagocytosis/fusion markers in *Znrf3 cKO* female adrenals at this stage (Fig  
423 7D). Interestingly, gene set enrichment analyses showed strong enrichment of phagocytosis-  
424 associated signatures, but no enrichment of DNA proliferation / cell-cycle pathways in male  
425 *Znrf3 cKO* RNA sequencing data at 78 weeks (Fig 7E). In contrast, female knockouts showed  
426 high enrichment of proliferation signatures, but no enrichment of phagocytosis (Fig 7E).  
427 Altogether, these data strongly suggest that even though macrophages are still present within  
428 tumour tissues at 78 weeks in both males and females, the lack of phagocytic activity is  
429 associated with aggressive tumour progression in females.

430

### 431 **Phagocytic macrophages signatures are prominent in male ACC patients and associated** 432 **with better prognosis**

433 To further evaluate the role of macrophages in ACC progression, we evaluated their infiltration  
434 within human ACC. For this, we used RNA sequencing data from the TCGA consortium (79  
435 sequenced ACCs) and evaluated expression of a 10-gene signature (based on single cell RNA  
436 sequencing data from mouse adrenals) as a proxy to general macrophages infiltration.  
437 Interestingly, tumours of the good prognosis group, defined as C1B, had significantly higher  
438 expression of the macrophages signature than tumours of the bad prognosis C1A group (Fig  
439 8A). Consistent with our data showing similar infiltration of IBA-1<sup>+</sup> macrophages in male and  
440 female *Znrf3 cKO* adrenals at 78 weeks (Fig 7B), there was no difference in the general  
441 macrophage signature expression between ACC in men (n=31) and women (n=48) (Fig 8B).  
442 However, a three gene phagocytic macrophage signature (*CD68*, *TREM2*, *TYROBP*) was  
443 significantly expressed at higher levels in men (Fig 8C), and in the good prognosis C1B group

444 of ACC (Fig 8D). High expression of the phagocytic signature (above median) was also  
445 associated with better survival, compared with low expression (below median) in Kaplan-Meier  
446 analysis (Fig 8E). Altogether, this suggested that infiltration with phagocytic macrophages was  
447 more frequent in men than in women and associated with better prognosis.

448 Detailed analysis of RNA sequencing data identified 365 genes that were significantly  
449 deregulated ( $FDR < 0.01$ ,  $abs(\text{Log}_2FC) > 2$ ) between the groups of high and low expression of  
450 the phagocytic signature (Fig 8F). As expected, macrophages-associated genes such as *CD68*,  
451 *CSF1R*, *ITGAM*, *LAPTM5*, *CYBB* and *SIGLEC9* were up-regulated in phagocytic-high patients  
452 (Fig 8F). Gene set enrichment analyses confirmed enrichment of macrophages (Fig S7A) and  
453 phagocytosis signatures (Fig 8G). Consistent with data in our mouse models, phagocytic  
454 signatures were also associated with enrichment of senescence and NF $\kappa$ B signalling gene sets  
455 (Fig 8G), suggesting that these pathways may also play a role in phagocytic macrophages  
456 recruitment in ACC patients. Gene ontology analysis using the C5 GO database (MsigDB)  
457 showed that the top 35 positively enriched gene sets were all related with immune response and  
458 inflammation in patients with high expression of the phagocytic signature, suggesting that this  
459 subgroup was mounting a more profound immune response than patients with low expression  
460 of the signature (Fig S7B). Deconvolution of RNAseq data using Cibersort X showed that  
461 macrophages were the most prominent immune cell population in the two groups of patients,  
462 consistent with mouse adrenals (Fig 8H). Interestingly, it also showed that enrichment of  
463 macrophages signatures in the phagocytic-high subgroup of patients was associated with  
464 increased cytotoxic CD8<sup>+</sup> T lymphocytes signatures (Fig 8H). However, this was also correlated  
465 with lower B cells, plasma cells and NK cells and higher T-regulatory cells infiltration (Fig  
466 8H), suggesting that the phagocytic-high subgroup of patients had a broad alteration of the  
467 immune tumour microenvironment.

468  
469 Altogether, these observations suggest that phagocytic macrophages, which are more prominent  
470 in male than female ACC patients, are associated with senescence, global innate and adaptive  
471 immune response and better prognosis.

## 472 473 **Discussion**

474 Apart from reproductive tissues, cancers are generally more frequent and aggressive in men  
475 than in women, even after adjusting for known risk factors<sup>1,2</sup>. Although adrenocortical  
476 carcinoma is one of the rare exceptions to this rule, the mechanisms underlying the higher  
477 incidence and aggressiveness in women remain elusive. Here, we show that conditional deletion

478 of *Znrf3* within steroidogenic cells of the adrenal cortex, results in sexually dimorphic  
479 development of full-fledged metastatic ACC in female mice over an 18-month time course,  
480 whereas the initial hyperplasia gradually regresses in males. By a combination of RNA  
481 sequencing, flow cytometry and immunohistochemical analyses, we show that *Znrf3 cKO*  
482 males efficiently recruit macrophages from early stages of preneoplastic transformation,  
483 following induction of senescence. We further show that these macrophages, which  
484 differentiate as potent phagocytes are required for clearance of preneoplastic cells. Although  
485 females also mount an innate immune response to preneoplastic transformation, it is delayed  
486 compared to males and never achieves efficient clearance of preneoplastic cells. This  
487 phenomenon is maintained up to 78 weeks, when indolent lesions in male *Znrf3 cKO* adrenals  
488 are still infiltrated with large amounts of phagocytic macrophages, as opposed to aggressive  
489 female tumours. Consistent with our findings in mice, we show that a phagocytic macrophage  
490 signature is more prominent in male than in female ACC patients, where it is associated with  
491 better prognosis. This strongly suggests that the sexual dimorphism of ACC may result from  
492 differential recruitment and activation of phagocytic tumour associated macrophages (TAMs),  
493 which prevent both tumour initiation and progression in the adrenal cortex.

494  
495 This is in contrast with most data of the literature showing that TAMs are generally associated  
496 with tumour progression and poor prognosis in many cancers, even though they may initially  
497 prevent tumour initiation<sup>7,32,46–48</sup>. Plasticity and diversity of TAMs explain their divergent  
498 functions. The standard dual classification of macrophages postulates that M1 macrophages  
499 that differentiate in response to proinflammatory cytokines (*e.g.* interferons and tumour  
500 necrosis factors) are involved in anti-tumour activities, whereas M2 macrophages that  
501 differentiate in response to immunomodulatory signals (*e.g.* IL-4, IL-10 and TGF- $\beta$ ) are  
502 associated with tumour promotion<sup>49</sup>. However, recent single cell RNA sequencing analyses of  
503 tumour infiltrating myeloid cells showed that M1 and M2 gene signatures were co-expressed  
504 in macrophage subsets from almost all cancer types<sup>47</sup>. Consistent with this idea, our RNA  
505 sequencing and flow cytometry analyses suggested that macrophages that accumulate in the  
506 adrenals of *Znrf3 cKO* males had mixed characteristics of the M1 and M2 phenotypes.  
507 Furthermore, we did not find evidence of overexpression of canonical tumoricidal macrophages  
508 markers such as the pro-inflammatory cytokines IL-1 $\beta$ , IL-2, IL-6, IL-12 and IL-23 (Fig 2B) or  
509 iNOS, which metabolizes arginine into the killer molecule nitric oxide (not shown). This  
510 suggests that the tumoricidal function of adrenal macrophages relies on alternative activities.

511 Consistent with this idea, we show a very strong increase in the phagocytic activity of  
512 macrophages in *Znrf3 cKO* male adrenals compared with their wild-type littermates and *Znrf3*  
513 *cKO* females. This activity is associated with cytoplasmic accumulation of CD68 and high  
514 membrane expression of MERTK, TYROBP and TREM2, which play a central role in the  
515 phagocytic process<sup>35,38,40–42</sup>. Although *MERTK* expression did not correlate with the presence  
516 of macrophages in ACC patients (not shown), we show that increased expression of the  
517 phagocytic *CD68/TREM2/TYROBP* signature is correlated with better prognosis, within the  
518 TCGA cohort. This strongly suggests that phagocytosis plays a central role in the tumoricidal  
519 activity of macrophages in ACC. Interestingly, scRNA sequencing in human and mouse  
520 colorectal cancer identified a population of C1QC<sup>+</sup> TAMs, characterised by high levels of  
521 *CIQA/B/C*, *TREM2* and *MERTK* expression, which were associated with potential recruitment  
522 and activation of T cells, phagocytosis and better prognosis<sup>47,50</sup>. Although we did not analyse  
523 macrophages by single cell RNA sequencing in *Znrf3 cKO* adrenals, our bulk RNA sequencing  
524 data show strong up-regulation of all these markers (Fig 3B), which are mostly expressed by  
525 macrophages in scRNA seq datasets from wild-type mouse adrenals (Fig S8A). This strongly  
526 suggests that tumoricidal TAMs found in ACC may be related with the phagocytic C1QC<sup>+</sup>  
527 TAMs identified in other cancers<sup>47,50</sup>.

528  
529 Interestingly, we could find large numbers of macrophages (up to 15% of total cells in the  
530 tumour) in aggressive tumours in 78-week-old *Znrf3 cKO* female mice (Fig 7B), even though  
531 they were not differentiated as MERTK-hi active phagocytes. The presence of macrophages  
532 was further confirmed in ACC patients, where Cibersort X deconvolution suggested that they  
533 represented 31% of all immune cells, even in the tumours expressing low levels of the  
534 phagocytic signature (40% in phagocytic high tumours, Fig 8H). These data suggest that even  
535 in aggressive phagocytic-low lesions, macrophages may be reprogrammed to stimulate their  
536 tumoricidal potential. A large panel of molecules targeting macrophages is now available. Most  
537 of these pharmacological compounds or monoclonal antibodies aim at reducing macrophages  
538 infiltration within the tumour microenvironment, which our data suggest is not the best  
539 approach in ACC. However, strategies that stimulate tumoricidal activity and particularly  
540 phagocytosis of tumour cells by macrophages are currently being investigated<sup>49</sup>. Particularly  
541 interesting is the approach that aims at inhibiting the CD47 “don’t-eat-me” signal produced by  
542 cancer cells and/or the SIRP $\alpha$  receptor for CD47 on macrophages. In preclinical mouse models,  
543 this approach allowed stimulation of phagocytosis and tumour regression and also enhanced  
544 tumour antigen cross-presentation, resulting in adaptive immune responses<sup>51,52</sup>. It is currently



545 evaluated in a number of cancers such as non-hodgkin lymphomas and acute myeloid  
546 leukaemia, where it results in good overall response rates in the absence of overt toxicities<sup>49</sup>.  
547 Another interesting approach aims at stimulating Toll-Like Receptor signalling (TLR) with  
548 TLR agonists, which stimulates macrophages tumoricidal activity and allows for secretion of  
549 IL-12 and TNF, which promotes a cytotoxic CD8<sup>+</sup> T cell response. Agonists such as FDA-  
550 approved imiquimod (TLR7) or vidotilimod (TLR9) provide interesting responses in the  
551 context of basal cell carcinoma and metastatic melanoma, respectively<sup>49</sup>. Monophosphoryl lipid  
552 A (MPLA) a TLR4 agonist that is used as an FDA-approved vaccine adjuvant, was also  
553 demonstrated to trigger efficient innate and adaptive immune responses in association with IFN-  
554  $\gamma$ , in the context of preclinical mouse models of breast and ovarian tumours<sup>53</sup>. One important  
555 factor that these therapeutic approaches will have to consider in the context of ACC, is the  
556 presence of high levels of glucocorticoids produced by adrenal steroidogenic cells, in particular  
557 within hormonally active tumours. Although glucocorticoids do not have the same detrimental  
558 impact on macrophages that they have on lymphocytes, they are generally associated with M2-  
559 like tolerogenic differentiation<sup>54</sup>. Therefore, therapeutics targeting macrophages in ACC,  
560 should probably consider combining macrophage activation with inhibition of glucocorticoid  
561 production or signalling, which would also favour recruitment of adaptive immune cells to the  
562 lesion. Availability of our clinically relevant mouse model will allow evaluation of these novel  
563 options.

564

565 An intriguing feature of the immune response following *Znrf3* deletion, is the formation of  
566 multinucleated giant cells (MGCs), resulting from the fusion of mononucleated macrophages.  
567 MGCs were first described in tuberculosis but are also present in sterile chronic inflammatory  
568 conditions and in response to macroscopic foreign bodies<sup>55,56</sup>. Literature on their association  
569 with tumours is rather scarce. However, they have been observed at high frequency in squamous  
570 cell carcinomas of multiple tissues<sup>57</sup> and papillary thyroid carcinomas<sup>58</sup>. They can either be  
571 correlated with good<sup>57</sup> or poor prognosis<sup>58</sup> depending on the tumour type and in vitro studies  
572 have associated MGCs with increased capacity for complement-mediated phagocytosis of large  
573 targets and amyloid deposits<sup>55</sup>. In *Znrf3* cKO adrenals, MGCs are characterised by high levels  
574 of CD68, F4/80, MERTK, TYROBP and TREM2 expression and drastically reduced  
575 expression of IBA-1 (Fig 2G-I & Fig S4C-D). They appear early in male adrenals, almost  
576 concomitant with regression of hyperplasia and are maintained up to 78 weeks. In contrast, they  
577 only appear at late stages in females, are less frequent than in males and are mostly found

578 associated with indolent non-metastatic lesions at 78 weeks. Although we did not analyse  
579 macrophages *in situ* in ACC samples from patients, we further observed enrichment of a gene  
580 signature associated with development of MGCs from monocyte progenitors<sup>59</sup>, within the high-  
581 phagocytosis group of patients. Altogether, this suggests that MGCs may play a role in clearing  
582 out neoplastic cells within both mouse and human tumours. Alternatively, their appearance may  
583 be a by-product of phagocytic clearance of neoplastic cells by mononuclear macrophages that  
584 would then fuse to form MGCs. This scenario could be facilitated by the high expression of  
585 TYROBP and TREM2 which have been shown to establish a fusion-competent state for  
586 macrophages<sup>31</sup>. Progressive cholesterol accumulation resulting from phagocytosis of  
587 cholesterol-laden steroidogenic cells, may also play a role in this phenomenon. Indeed,  
588 cholesterol is an essential and rate-limiting factor for formation of MGCs<sup>59</sup> and oil-red-o  
589 staining of *Znrf3 cKO* male adrenals at 12 weeks showed a strong accumulation of lipids within  
590 MGCs (Fig S8B).

591  
592 Another striking feature of the phenotype is the strong sexual dimorphism in immune response  
593 to neoplasia. It culminates with the robust and early recruitment of tumoricidal phagocytic  
594 macrophages in male mice, which results in regression of hyperplasia and prevents aggressive  
595 tumorigenesis, specifically in this gender. We further show that testosterone treatment of  
596 females from 4 to 12 weeks is sufficient to trigger a response which is comparable to males and  
597 results in regression of hyperplasia (Fig 5). This strongly suggests a role of male hormones in  
598 this phenomenon and raises the question of the underlying mechanisms. One possibility is an  
599 intrinsic sexual dimorphism of macrophages within the adrenal, which would result in  
600 differential responses to oncogenic transformation of steroidogenic cells. Indeed, recruitment,  
601 replenishment and activation mechanisms of macrophages have been shown to diverge between  
602 males and females, resulting in sexually dimorphic responses to infection and proinflammatory  
603 stimuli. However, in most instances, female macrophages are more responsive to stimuli,  
604 mount a more robust response and have higher phagocytic capacities than male macrophages<sup>60-</sup>  
605 <sup>65</sup>. This suggests that the stronger inflammatory response observed in male *Znrf3 cKO* adrenals  
606 may result from indirect effects of sex hormones. Consistent with this, single cell sequencing  
607 data suggest that the androgen receptor *Ar* is only expressed in a small subset of adrenal  
608 macrophages, characterized by lower expression of *Trem2* and *Mertk*, which is unlikely to  
609 represent the major population of macrophages in *Znrf3c KO* adrenals (Fig S8A&C). Our data  
610 showing a strong association between induction of SASP and recruitment of macrophages  
611 suggest that androgens may stimulate the tumoricidal response by inducing release of

612 senescence associated cytokines by *Znrf3* cKO cells (Fig 6). In line with this hypothesis, AR  
613 activation was shown to induce p53-independent senescence in prostate cancer cells<sup>66,67</sup> and a  
614 short-term testosterone treatment was sufficient to induce SA- $\beta$ galactosidase activity in female  
615 *Znrf3* cKO adrenals (Fig 6). This raises the question of the links between *Znrf3* inactivation,  
616 AR signalling and senescence induction. One may speculate that the recently documented  
617 sexual dimorphism in cortical cell proliferation, renewal and progenitor populations<sup>8,9</sup> may  
618 result in sexually dimorphic response to *Znrf3* inactivation. In this context, the  
619 hyperproliferation observed in both male and female *Znrf3* cKO adrenals may result in faster  
620 exhaustion of progenitor pools in males and subsequent induction of senescence. However, the  
621 rapid induction of SA- $\beta$ galactosidase in testosterone-treated *Znrf3* cKO females suggests that  
622 this is an unlikely scenario. Alternatively, these findings may reflect a novel function of ZNRF3  
623 in the control of cellular homeostasis. Interestingly, although we were able to show a mild  
624 induction of *Axin2* accumulation in *Znrf3* cKO adrenals by RNA in-situ hybridization<sup>29</sup>,  
625 analysis of our RNA sequencing data did not show evidence of canonical WNT signalling  
626 induction in either male or female knockouts (Fig S8D), when compared with a previously  
627 published model of constitutive  $\beta$ -catenin activation<sup>68</sup>. This suggests that the impact of *Znrf3*  
628 inactivation on senescence induction may involve WNT-independent mechanisms.  
629 Interestingly, inactivation of *Znrf3* and its homologue *Rnf43* in hepatocytes results in  
630 hyperplasia, followed by cell death and senescence induction. This is associated with  
631 deregulation of lipid and phospholipid metabolism through both canonical and non-canonical  
632 WNT pathway activation<sup>69</sup>. Whether similar mechanisms resulting in accumulation of toxic  
633 lipids are involved in senescence induction in the adrenal cortex, remains to be investigated.

634

635 In conclusion, we describe a novel interaction between tumour suppressor inactivation,  
636 senescence induction and recruitment of tumoricidal macrophages, which results in sexually  
637 dimorphic adrenal cancer development. This provides novel insight into the strong gender bias  
638 of this particularly aggressive cancer and may help develop novel macrophage-centric  
639 therapeutic approaches.

640

#### 641 **Acknowledgments**

642 We thank Sandrine Plantade, Khirredine Ouchen and Philippe Mazuel for animal care and Dr  
643 Laura Bousset (LMS, London) for fruitful discussions. The TREM2 antibody was supplied by  
644 the Haass Lab at Ludwig Maximilians University Munich, specifically by Alice Suelzen and

645 Dr Kai Schlepckow. Single cell RNA sequencing data from mouse adrenals were kindly  
646 provided by Dr Cynthia Andoniadou and Val Yianni (King's College London). Protocol for  
647 mouse adrenal tissue dissociation for flow cytometry and flow cytometry parameters were  
648 kindly provided by Dr Marc Bajénoff and Dr Mitchell Bijnen (CIML, Marseille). This work  
649 was supported by grants from Worldwide Cancer Research (#16-1052), la Ligue Nationale  
650 Contre le Cancer ("Equipe Labellisée Ligue" and individual grant to JJW), Fondation ARC  
651 (individual grant to JO) and Agence Nationale pour la Recherche (ANR-21-CE14-0044-  
652 ADREMAC).

653

#### 654 **Authors contributions**

655 JJW performed experiments, analysed data, prepared the manuscript

656 JO performed experiments, analysed data, prepared the manuscript

657 DGG performed experiments, analysed data, prepared the manuscript

658 CL performed experiments

659 RG conceived experiments

660 FRB performed experiments

661 DD performed experiments

662 CDS performed experiments

663 ISB performed experiments

664 JCP performed experiments

665 YR analysed data

666 AL performed experiments

667 IT conceived experiments, discussed findings

668 AMLM conceived experiments, discussed findings

669 AM conceived experiments, discussed findings

670 PV conceived experiments, performed experiments, analysed data, wrote the manuscript

671

#### 672 **Declaration of interests**

673 The authors declare no competing interests

674

#### 675 **Figure legends**

676

677 **Figure 1. Sexually dimorphic tumour progression in *Znrf3 cKO* adrenals. A-** Female  
678 adrenal weights measured from 4 to 78 weeks in wild-type and *Znrf3 cKO* (ZKO) adrenals. **B-**

679 Rate of metastasis in 78-week-old *Znrf3 cKO* females. **C-** Histology (upper panels) and  
680 immunohistochemical analysis of Ki67 expression (lower panels) in 78-week-old female  
681 controls, *Znrf3 cKO* adrenals associated with metastasis formation or indolent *Znrf3 cKO*  
682 adrenals. **D-** Quantification of the Ki67 proliferation index as the ratio of positive cells over  
683 total nuclei in the cortex of 78-week-old control and *Znrf3 cKO* females. **E-** Male adrenal  
684 weights measured from 4 to 78 weeks in wild-type and *Znrf3 cKO* (ZKO) adrenals. **F-** Rate of  
685 metastasis in 78-week-old *Znrf3 cKO* males. **G-** Histology (upper panels) and  
686 immunohistochemical analysis of Ki67 expression (lower panels) in 78-week-old male controls  
687 and *Znrf3 cKO* adrenals. **H-** Quantification of the Ki67 proliferation index as the ratio of  
688 positive cells over total nuclei in the cortex of 78-week-old control and *Znrf3 cKO* males. **I-**  
689 Kinetic analysis of the Ki67 proliferation index from 4 to 52 weeks in male and female control  
690 and *Znrf3 cKO* adrenals. **J-** Kinetic analysis of the histological phenotype from 4 to 52 weeks  
691 in male and female control and *Znrf3 cKO* adrenals. Arrowheads in insets show multinucleated  
692 giant cells that accumulate in the inner cortex of mutant male mice and to a lesser extent mutant  
693 female mice. M: medulla; zF: zona fasciculata; zG: zona glomerulosa; Tu: tumour. Scale bar  
694 = 200µm. Graphs represent mean +/- SEM. Statistical analyses in A, D, E, H and I were  
695 conducted by Mann-Whitney tests. ns : not significant; \* p<0.05; \*\* p<0.01; \*\*\* p<0.001; \*\*\*\*  
696 p<0.0001.

697

698 **Figure 2. Regression in male *Znrf3 cKO* adrenals is correlated with macrophages**  
699 **infiltration and fusion.** **A-** Gene Set Enrichment Analysis (GSEA) of gene expression data  
700 (RNA sequencing) from 4, 6 and 12-week-old control and *Znrf3 cKO* male adrenals. The plot  
701 represents the 35 gene sets from the C5 Gene Ontology database (MSigDB), with the highest  
702 enrichment score in *Znrf3 cKO* adrenals compared with controls at 12 weeks. **B-** Heatmap  
703 representing median-centred expression of cytokines/chemokines-coding genes in control and  
704 *Znrf3 cKO* adrenals at 4, 6 and 12 weeks. Only genes significantly deregulated at 12 weeks  
705 (FDR<0.05) are represented. They are sorted by decreasing Log<sub>2</sub>-fold-change. **C-**  
706 Immunohistochemical analysis of CD45 expression in adrenals from control and *Znrf3 cKO*  
707 (ZKO) mice at 4, 6 and 12 weeks. Arrowheads show multinucleated giant cells. Stars show  
708 mononucleated leukocytes. **D-** Stacked bar plots representing immune cell populations  
709 deconvoluted using CibersortX and the LM22 expression matrix, from gene expression data in  
710 control and *Znrf3 cKO* adrenals at 4, 6 and 12 weeks. **E-** Enrichment analysis (GSEA) of  
711 macrophages signatures derived from ImmuCC, LM22, and single cell RNA sequencing of  
712 mouse adrenals, in 12-week-old male *Znrf3 cKO* adrenals compared to controls. **F-** Left,

713 representative dot plots of flow cytometry analysis of macrophages infiltration in 4 and 6-week-  
714 old control (top panels) and *Znrf3* *cKO* (bottom panels) adrenals. Macrophages were defined as  
715 CD45<sup>+</sup>/CD64<sup>+</sup>/F4/80<sup>+</sup> live cells. Right panel, quantification of flow cytometry experiments. **G-**  
716 Immunohistochemical analysis of pan-macrophages markers IBA-1, F4/80 and CD68 in 4, 6  
717 and 12-week-old control and *Znrf3* *cKO* adrenals. Arrowheads show multinucleated giant cells.  
718 Stars show mononucleated macrophages. **H-** Immunohistochemical analysis of macrophage  
719 fusion-associated markers TREM2 and TYROBP in 6 and 12-week-old control and *Znrf3* *cKO*  
720 adrenals. Arrowheads show multinucleated macrophages. Stars show mononucleated  
721 macrophages. **I-** High-magnification images of TREM2 and TYROBP staining showing fusion  
722 of mononucleated with multinucleated macrophages in *Znrf3* *cKO* adrenals at 12 weeks  
723 (arrowheads). Co: cortex; M: medulla; scale bar =200µm. Graphs represent mean +/- SEM.  
724 Statistical analyses in F, were conducted by Mann-Whitney tests. \* p<0.05; \*\* p<0.01.

725

726 **Figure 3. Infiltrating macrophages actively phagocytose steroidogenic cells.** **A-** Gene Set  
727 Enrichment Analysis (GSEA) of gene expression data (RNA sequencing) from 4, 6 and 12-  
728 week-old control and *Znrf3* *cKO* male adrenals. The plot represents enrichment of  
729 phagocytosis/efferocytosis gene sets in *Znrf3* *cKO* male adrenals compared with controls. **B-**  
730 Heatmap representing median-centred expression of key regulators of the phagocytic pathway  
731 in control and *Znrf3* *cKO* male adrenals at 4, 6 and 12 weeks. **C-** RTqPCR analysis of the  
732 expression of phagocytosis-associated genes in control and *Znrf3* *cKO* male adrenals at 12  
733 weeks. **D-** Immunohistochemical analysis of the expression of the phagocytosis receptor  
734 MERTK in control and *Znrf3* *cKO* male adrenals at 4, 6 and 12 weeks. Arrowheads show  
735 multinucleated macrophages. Stars show mononucleated macrophages. **E-F** Evaluation of  
736 phagocytosis by immunohistochemistry for 3βHSD (steroidogenic cells) and IBA-1 (E) or SF-  
737 1 (steroidogenic cells) and MERTK (F). Images were acquired by confocal microscopy and  
738 phagocytic events were counted when steroidogenic markers were found within the boundaries  
739 of macrophages markers along the Z-stack. Panels show representative zoomed-in images  
740 (x120) in 9-week-old (IBA-1) and 12-week-old (MERTK) *Znrf3* *cKO* adrenals. White boxes  
741 show phagocytic events on the 2D projection of Z-stack and within the orthogonal projections  
742 (side images). Bottom graphs represent quantification of phagocytic events on 10 high power  
743 fields (HPF, x40) per individual mouse from 4 to 9 weeks (IBA-1<sup>+</sup> phagocytosis) and at 12  
744 weeks (MERTK-hi phagocytosis). **G-** Immunohistochemical (MERTK & SF-1) and  
745 histological (H&E) analysis of *Znrf3* *cKO* male mice that received control or Pexidartinib-  
746 enriched chow from 9 to 12 weeks (left panels). Percentages of MERTK-positive and SF-1-



747 positive cells, relative to total cortical cell numbers (DAPI<sup>+</sup>) are displayed on the graphs (right  
748 panel). Co: cortex; M: medulla; scale bar =200 $\mu$ m. Graphs represent mean  $\pm$  SEM. Statistical  
749 analyses in C, E, F and G were conducted by Mann-Whitney tests. \*  $p<0.05$ ; \*\*  $p<0.01$ ; \*\*\*  
750  $p<0.001$ ; \*\*\*\*  $p<0.0001$ .

751

752 **Figure 4. Recruitment of phagocytic macrophages is delayed in females.** **A-**  
753 Immunohistochemical analysis of IBA-1 expression in female control and *Znrf3 cKO* adrenals  
754 from 4 to 52 weeks. **B-** Quantification of the IBA-1 index as the ratio of IBA-1-positive cells  
755 over total nuclei in the cortex of control and *Znrf3 cKO* male (blue) and female (pink) mice  
756 from 4 to 52 weeks. **C-** GSEA of macrophages gene sets in male *Znrf3 cKO* compared with  
757 female *Znrf3 cKO* adrenals at 12 weeks. **D-** GSEA of the cytokine gene set in *Znrf3 cKO* males  
758 and females compared with their respective control adrenals at 12 weeks. **E-** Quantification of  
759 the number of fused macrophages (at least 2 nuclei) in control and *Znrf3 cKO* male and female  
760 adrenals from 4 to 52 weeks. **F-** Immunohistochemical analysis of MERTK expression in  
761 control and *Znrf3 cKO* female adrenals from 4 to 52 weeks. **G-** Quantification of the MERTK<sup>+</sup>  
762 index as the ratio of MERTK-positive cells over total nuclei in the cortex of control and *Znrf3*  
763 *cKO* male (blue) and female (pink) mice from 4 to 52 weeks. **H-** Quantification of phagocytic  
764 events following immunohistochemistry for IBA-1 and 3 $\beta$ HSD (IBA-1<sup>+</sup> phagocytosis) or  
765 MERTK and SF-1 (MERTK<sup>high</sup> phagocytosis) in control and *Znrf3 cKO* females from 4 to 12  
766 weeks. Quantification was performed on 10 high power fields (HPF, x40) per individual mouse.  
767 **I-** Gene Set Enrichment Analysis (GSEA) of gene expression data (RNA sequencing) from 4,  
768 6, 12 and 52-week-old control and *Znrf3 cKO* female adrenals. The plot represents enrichment  
769 of phagocytosis/efferocytosis gene sets in *Znrf3 cKO* female adrenals compared with controls.  
770 **J-** RTqPCR analysis of the expression of phagocytosis and macrophages fusion-associated  
771 genes in control and *Znrf3 cKO* female adrenals at 12 weeks. Co: cortex; Tu: tumor; Scale bar  
772 = 200 $\mu$ m. Graphs represent mean  $\pm$  SEM. Statistical analyses in B, E, G, H and J were  
773 conducted by Mann-Whitney tests. ns: not significant; \*  $p<0.05$ ; \*\*  $p<0.01$ ; \*\*\*  $p<0.001$ ; \*\*\*\*  
774  $p<0.0001$ .

775

776 **Figure 5. Androgens are sufficient to trigger early recruitment of phagocytic**  
777 **macrophages and regression of hyperplasia.** **A-** Cartoon of the experimental setup. **B-**  
778 Immunohistochemical analysis of MERTK expression in 12-week-old placebo and  
779 testosterone-treated *Znrf3 cKO* females. An untreated 12-week-old *Znrf3 cKO* male was  
780 included as a reference. **C-** Quantification of the MERTK<sup>+</sup> index as the ratio of MERTK-

781 positive cells over total nuclei in the cortex of placebo and testosterone-treated females at 12  
782 weeks. **D-** RTqPCR analysis of the expression of macrophages-related genes in placebo and  
783 testosterone-treated *Znrf3 cKO* female adrenals at 12 weeks. **E-** RTqPCR analysis of the  
784 expression of phagocytosis and macrophages fusion-associated genes in placebo and  
785 testosterone-treated *Znrf3 cKO* female adrenals at 12 weeks. **F-** Adrenal weights from placebo  
786 and testosterone-treated 12-week-old *Znrf3 cKO* females. 12-week-old untreated control  
787 males/females and *Znrf3 cKO* males/females from Fig 1A&E were included as a reference. Co  
788 : cortex; Scale bar = 200  $\mu$ m. Graphs represent mean +/- SEM. Statistical analyses in D and E  
789 were conducted by Mann-Whitney tests. In F, statistical analyses were conducted by one-way  
790 ANOVA followed by a Kruskal-Wallis *post-hoc* test. ns: not significant; \*  $p < 0.05$ ; \*\*  $p < 0.01$ ;  
791 \*\*\*  $p < 0.001$ .

792

793 **Figure 6. Recruitment of phagocytic macrophages in male *Znrf3 cKO* mice is associated**  
794 **with sexually dimorphic induction of senescence. A-** Gene Set Enrichment Analysis (GSEA)  
795 of gene expression data (RNA sequencing) from 4, 6 and 12 control and *Znrf3 cKO* male and  
796 female adrenals. The plot represents enrichment of senescence-associated gene sets in *Znrf3*  
797 *cKO* compared with controls (sex matched). **B-** Quantification of the P21<sup>+</sup> index as the ratio of  
798 P21-positive cells over total nuclei in the cortex of male and female control and *Znrf3 cKO*  
799 mice from 4 to 12 weeks. **C-** Detection of the senescence associated acidic  $\beta$ -galactosidase  
800 activity on frozen tissue sections from male and female control and *Znrf3 cKO* mice at 4, 6 and  
801 12 weeks. Sections were counterstained with hematoxylin. **D-** Heatmap showing expression of  
802 senescence associated secretory phenotype (SASP) genes in 12-week-old male and female  
803 control and *Znrf3 cKO* adrenals. Genes were selected on the basis of significant deregulation in  
804 12-week-old male *Znrf3 cKO* adrenals (FDR<0.1) and sorted by Log<sub>2</sub> fold-change. **E-** RTqPCR  
805 analysis of the expression of SASP genes in control and *Znrf3 cKO* males (E - top panel) control  
806 and *Znrf3 cKO* females (E- bottom panel). **F-** Detection of SA $\beta$ -Galactosidase activity in the  
807 adrenals of *Znrf3 cKO* females that received placebo or testosterone treatment from 4 to 5  
808 weeks. An untreated 6-week-old *Znrf3 cKO* male was included as a reference. **G-** RTqPCR  
809 analysis of the expression of SASP genes in placebo and testosterone-treated *Znrf3 cKO*  
810 females from Fig 5. **H-** Immunohistochemical analysis of GFP (marking SF-1:Cre-mediated  
811 recombination of mTmG in steroidogenic cells), F4/80 and SA $\beta$ Galactosidase activity. Right  
812 panels show a high-magnification crop of the area delineated in white in left panels. Blue  
813 arrowheads show senescent GFP<sup>+</sup> cells; brown arrowheads show F4/80<sup>+</sup> macrophages. Co:

814 cortex; Scale bar = 200  $\mu\text{m}$  (C-F) ; 100  $\mu\text{m}$  (H). Graphs represent mean  $\pm$  SEM. Statistical  
815 analyses in B and E were conducted by Mann-Whitney tests. ns: not significant; \*  $p < 0.05$ ; \*\*  
816  $p < 0.01$ ; \*\*\*  $p < 0.001$ ; \*\*\*\*  $p < 0.0001$ .

817

818 **Figure 7. Aggressive tumourigenesis is associated with infiltration of non-phagocytic**  
819 **macrophages in female adrenals. A-** Immunohistochemical analysis of IBA-1 and MERTK  
820 expression in control males/females and *Znrf3 cKO* males/females at 78 weeks. For *Znrf3 cKO*  
821 females, the panels represent indolent tumours (no metastases) and aggressive tumours with or  
822 without macrophages infiltration. **B-** Quantification of the IBA-1<sup>+</sup> and MERTK<sup>+</sup> index as the  
823 ratio of IBA-1 (left) or MERTK-positive (right) cells over total nuclei in the cortex of male and  
824 female control and *Znrf3 cKO* mice at 78 weeks. Values for primary tumours associated with  
825 metastases are shown as black dots. **C-** RTqPCR analysis of the expression of macrophages-  
826 related genes in control and *Znrf3 cKO* males (top panel) and control and *Znrf3 cKO* females  
827 (bottom panel) at 78 weeks. **D-** RTqPCR analysis of the expression of phagocytosis and  
828 macrophages fusion-associated genes in control and *Znrf3 cKO* males (top panel) and control  
829 and *Znrf3 cKO* females (bottom panel) at 78 weeks. **E-** Gene Set Enrichment Analysis (GSEA)  
830 of gene expression data (RNA sequencing) from 78 weeks control and *Znrf3 cKO* male and  
831 female adrenals. The plot represents enrichment of phagocytosis-associated gene sets and DNA  
832 replication-associated gene sets in *Znrf3 cKO* compared with controls (sex matched). Co:  
833 cortex; Tu: tumour; Scale bar = 200  $\mu\text{m}$ . Graphs represent mean  $\pm$  SEM. Statistical analyses  
834 in B and E were conducted by Mann-Whitney tests. ns: not significant; \*  $p < 0.05$ .

835

836 **Figure 8. Phagocytic macrophages signatures are prominent in male ACC patients and**  
837 **associated with better prognosis. A-** Expression of a global macrophage gene signature in  
838 ACC patients from the TCGA program, dichotomised as patients with good (C1B) and poor  
839 (C1A) prognosis. **B-** Expression of a global macrophage gene signature in ACC patients from  
840 the TCGA program, dichotomised as men and women. **C-** Expression of a phagocytic  
841 macrophage gene signature in ACC patients from the TCGA program, dichotomised as men  
842 and women. **D-** Expression of a phagocytic macrophage gene signature in ACC patients from  
843 the TCGA program, dichotomised as patients with good (C1B) and poor (C1A) prognosis. **E-**  
844 Survival analysis of patients of the TCGA program dichotomised as patients with high (red) or  
845 low (green) expression of the phagocytic signature. **F-** Volcano plot displaying differential gene  
846 expression between patients with high and low expression of the phagocytic signature. Red dots  
847 represent genes with a Log<sub>2</sub> fold-change > 2 and FDR < 0.01. Green dots represent genes with

848 Log<sub>2</sub> fold-change<-2 and FDR<0.01. G- GSEA of phagocytosis, senescence and NFκB-  
849 associated gene sets in patients with high expression of the phagocytic signature, compared  
850 with patients with low expression of the signature.

851

## 852 **Materials and Methods**

### 853 **Mice**

854 All experiments with mice were in accordance with protocols approved by the Auvergne Ethics  
855 Committee (CEMEAA). They were conducted in agreement with international standards for  
856 animal welfare in order to minimize animal suffering. *Znrf3 cKO* mice (ZKO) were generated  
857 by mating *Znrf3<sup>fl/fl</sup>* mice<sup>27</sup> with *SF1-Cre<sup>high</sup>* mice<sup>70</sup>. Mice were bred and maintained on a  
858 C57Bl/6 genetic background. Mice were euthanized by decapitation at the end of experiments  
859 and blood collected in vacuum blood collection tubes (VFD053STK, Terumo). Adrenals were  
860 extracted, cleaned of excess fat, weighed and immediately fixed in 4% paraformaldehyde or  
861 stored at - 80 °C. Littermate control animals were used in all experiments.

862

### 863 **Immunohistology**

864 Adrenals were fixed in 4% paraformaldehyde overnight at 4°C, then washed two times in PBS.  
865 For the paraffin embedding, adrenals were dehydrated through an ethanol gradient. Then they  
866 were incubated for 2 h in HistoClear (HS200; National Diagnostics, Fisher Scientific, Illkirch,  
867 France) and embedded in paraffin. For frozen sections, adrenals were successively placed into  
868 10% and 15% PBS-sucrose solutions for 20 minutes, then 20% PBS-sucrose solution for 1 hour,  
869 and in 50/50 OCT-Sucrose 20% solution overnight. Lastly, they were embedded in pure OCT  
870 solution and stored at -80°C. Paraffin and OCT samples were cut into 5 & 10µm sections,  
871 respectively. Haematoxylin/eosin staining was performed with a Microm HMS70 automated  
872 processor (Microm Microtech, Francheville, France), according to standard procedures.  
873 Antibody information, dilutions and unmasking conditions are listed in Supplementary Table  
874 1. Notably, the TREM2 antibody <sup>71</sup>, was supplied from the Haass Lab at Ludwig Maximilians  
875 University Munich. After deparaffinization with HistoClear and rehydration in decreasing  
876 ethanol gradients, unmasking was performed by boiling slides for 20 min in the appropriate  
877 unmasking solution. Next, endogenous peroxidases were inactivated by incubating slides with  
878 0.3% hydrogen peroxide for 30 min at room temperature. After blocking for 1h, slides were  
879 incubated overnight at room temperature with primary antibodies at the indicated  
880 concentrations (Supplementary Table 1). Primary antibodies were detected with appropriate  
881 species polymers (ImmPress Polymer Detection Kit, Vector Laboratories). Polymer-coupled

882 HRP activity was then detected with either Novared (SK-4800, Vector Laboratories) for  
883 brightfield images or TSA-Alexa-coupled fluorochromes for fluorescence (Thermo Fisher,  
884 Alexa\_488 B40953, Alexa\_555 B40955, Alexa\_647 B40958). For double-  
885 immunohistochemistry experiments, HRP was inactivated by incubation with 0.02% HCl for  
886 20 min after detection of the first antibody to avoid cross-reaction. Nuclei were counterstained  
887 with Haematoxylin for brightfield images or Hoechst for fluorescence (Thermo Fisher 33342).  
888 Slides were mounted using a 50/50 PBS-Glycerol solution. Images were acquired with a Zeiss  
889 AxioImager with Apotome2 or Zeiss Axioscan Z1 slide scanner. Images were minimally  
890 processed for global levels and white balance using Affinity Photo® and Affinity Designer®.  
891 Image settings and processing were identical across genotypes.

892 Quantifications were performed on scanned whole adrenals (Axio Scan Zeiss scanner, 20×  
893 images) using the QuPath software version 0.3.1 (Bankhead et al 2017). Briefly, annotations  
894 were made of whole adrenals or just the adrenal cortex, and the positive cell detection feature  
895 was used to identify positive cells. The threshold for identifying positive cells was set to avoid  
896 quantification of background on each image.

897 For quantification of phagocytosis, confocal images were acquired on a Zeiss LSM 800  
898 Airyscan confocal microscope with 40X magnification. Phagocytic events were identified and  
899 counted as the presence of steroidogenic cell markers (3βHSD or SF-1) within the boundaries  
900 of macrophages, defined by IBA-1 or MERTK staining. This was evaluated by a single  
901 operator, by manually scanning through Z-stacks of ten 40X images per adrenal. The operator  
902 was blinded to the genotype.

903

#### 904 **Senescence-associated beta-galactosidase (SA-β-galactosidase) staining**

905 SA-β-galactosidase staining was conducted following the protocol of Debacq et al (4) on frozen  
906 adrenal 10μm-sections. After drying for 15 min under a vacuum, the sections were rehydrated  
907 with PBS and then incubated overnight at 37°C in a humid atmosphere in a pH 6.0 staining  
908 solution composed of 7.4mM citric acid, 25.3mM dibasic sodium phosphate, 5mM  
909 K<sub>4</sub>[Fe(CN)<sub>6</sub>], 5mM K<sub>3</sub>[Fe(CN)<sub>6</sub>], 150mM sodium chloride, 2mM MgCl<sub>2</sub> and 1mg/mL X-gal.  
910 Slides were mounted using a 50/50 PBS-Glycerol solution and imaged on a Zeiss ApoTome  
911 microscope with an AxioCam MRm camera and/or a Axio Scan Zeiss scanner.

912

#### 913 **Testosterone supplementation experiment**

914 Testosterone or placebo implants were placed under gas anesthesia, in the interscapular region  
915 of 4-week-old *Znrf3 cKO* female mice for 60 days. These testosterone implants (T-M/60 Belma)

916 are designed to release daily doses of testosterone (from 51.9 to 154.5  $\mu\text{g}/24\text{hr}$  for plasma  
917 concentrations of 0.9-3.7 ng/ml) to produce physiological plasma concentrations in mice.

918

### 919 **Pexidartinib experiment**

920 Chow was purchased from SAFE Nutrition Services (Augy, France). Male Control & ZKO  
921 mice were fed either control chow (E8220A01R 00000 v0025 A04 Pur) or pexidartinib chow  
922 (E8220A01R 00000 v0398 A04 +0.29g/kg Pexidartinib) from 3-12 weeks of age. Pexidartinib  
923 (HY16749) was purchased from MedChemExpress and incorporated in the chow by SAFE  
924 Nutrition Services. Chow was replaced every 3-4 days, renewed weekly and stored at 4°C when  
925 not in use.

926

### 927 **FACS**

928 Adrenals were harvested and excess fat was removed under a dissecting microscope. Adrenals  
929 were immediately placed into 900 $\mu\text{L}$  of digestion medium (Supplementary Table 2) and placed  
930 on ice until the end of the harvest. Adrenals were digested by incubating with a thermomixer  
931 set at 37°C – 900 rpm- for 37 min, stopping to pipette up and down at 10, 20, 30, 35, & 37min.  
932 Digested samples were filtered through 100 $\mu\text{m}$  nylon mesh and centrifuged at 400g for 5 min  
933 at 4°C. Cells were resuspended in wash buffer (PBS – EDTA 2.5mM – DNase 100 $\mu\text{g}/\text{ml}$  –  
934 BSA 0.5%) and stained appropriately. Cells were stained with Fixable Near-IR live/dead stain  
935 (L34975, Invitrogen) for 30min at room temperature (RT), blocked with CD16/CD32 &  
936 TrueStain (426102, BioLegend) for 15 min at RT, and stained with the appropriate antibody  
937 panel for 20 min at RT (Supplementary Table 3). All staining/blocking steps were preceded and  
938 followed by wash steps which included centrifugation at 200g for 4 min, followed by  
939 resuspension of the pellet with either wash buffer or the appropriate solution. Cells were  
940 immediately analyzed on the Attune NxT Flow Cytometer (Reference: A24858). Detailed  
941 analyses of the results were done using FlowJo® software.

942

### 943 **Reverse-transcription quantitative PCR**

944 Adrenals were flash-frozen and stored at -80°C post-harvest. RNAs were extracted using the  
945 Macherey-Nagel Nucleospin RNA kit (REF #740955.250). After reverse transcription of 500ng  
946 of total RNAs, cDNAs were diluted 1/10 and PCR reactions were conducted using SYBR qPCR  
947 Premix Ex Taq II Tli RNase H+ (TAKRR820W, Takara). Primers can be found in  
948 Supplementary Table 4. Relative expression was calculated using the  $2^{-\Delta\Delta\text{CT}}$  method.

949



## 950 **RNA sequencing for gene expression analysis**

### 951 **Library preparation and sequencing**

952 RNA sequencing was performed by the GenomEast platform, a member of the 'France  
953 Genomique' consortium (ANR-10-INBS-0009). Library preparation was performed using  
954 TruSeq Stranded mRNA Reference Guide - PN 1000000040498. RNA-Seq libraries were  
955 generated from 300 ng of total RNA using TruSeq Stranded mRNA Library Prep Kit and IDT  
956 for Illumina - TruSeq RNA UD Indexes (96 Indexes, 96 Samples) (Illumina, San Diego, USA),  
957 according to manufacturer's instructions. Briefly, following purification with poly-T oligo  
958 attached magnetic beads, the mRNA was fragmented using divalent cations at 94°C for 2  
959 minutes. The cleaved RNA fragments were copied into first strand cDNA using reverse  
960 transcriptase and random primers. Strand specificity was achieved by replacing dTTP with  
961 dUTP during second strand cDNA synthesis using DNA Polymerase I and RNase H. Following  
962 addition of a single 'A' base and subsequent ligation of the adapter on double stranded cDNA  
963 fragments, the products were purified and enriched with PCR (30 sec at 98°C; [10 sec at 98°C,  
964 30 sec at 60°C, 30 sec at 72°C] x 12 cycles; 5 min at 72°C) to create the cDNA library. Surplus  
965 PCR primers were further removed by purification using SPRI select beads (Beckman-Coulter,  
966 Villepinte, France) and the final cDNA libraries were checked for quality and quantified using  
967 capillary electrophoresis. Libraries were sequenced on an Illumina HiSeq 4000 sequencer as  
968 single read 50 base reads. Image analysis and base calling were performed using RTA version  
969 2.7.7 and bcl2fastq version 2.20.0.422.

### 970 **Genome mapping and differential gene expression analyses**

971 Reads were filtered and trimmed to remove adapter-derived or low-quality bases using cutadapt  
972 v 3.2 and checked again with FASTQC v 0.11.7. Illumina reads were aligned to Mouse  
973 reference genome (mm10) with Hisat2 v 2.2.1. Read counts were generated for each annotated  
974 gene using R function "SummarizeOverlaps()" and RPKM were calculated for each gene.  
975 Differential expression analysis with multiple testing correction was conducted using the R  
976 Bioconductor DESeq2 package v 1.34.0.

### 977 **Generation of heatmaps**

978 Heatmaps to represent differential gene expression were generated with the *Biobase* and *gplots*  
979 packages in R. They represent median centered RPKM levels. Genes are either sorted by Log2  
980 fold-change or by unsupervised clustering.

981

## 982 **Reanalysis of single cell sequencing of adult mouse adrenals**

983 The Seurat R package<sup>72</sup> was used to perform clustering analysis of single-cell data from Lopez  
984 et al.<sup>73</sup>, available in the Gene Expression Omnibus GSE161751 (control adrenals from 10  
985 week-old male mice). Raw sequencing data and annotated gene–barcode matrices were used  
986 for the input. Cells with more than 20 genes and genes expressed in more than 3 cells were  
987 selected for further analysis. After studying the distribution of count depth, number of genes,  
988 and mitochondrial read fraction, low-quality cells with less than 1000 counts, less than 400  
989 genes detected, and percentage of mitochondrial gene counts higher than 25% were removed.  
990 Gene expression in each cell was then normalized by the total number of counts in the cell,  
991 multiplied by 10000 to get counts per 10000 (TP10K) and log-transformed to report gene  
992 expression as  $E = \log(\text{TP10K} + 1)$ .

993 The top 2,000 highly variable genes with a z-score cutoff of 0.5 were then centred and scaled  
994 to have a mean of zero and standard deviation of one, and used as inputs for initial principal  
995 component analysis (PCA). The number of principal components (PCs) was chosen according  
996 to the PCElbowPlot function and JackStrawPlot function. Next, the Louvain algorithm  
997 implemented in Seurat was used to iteratively group cells together, with the goal of optimizing  
998 the standard modularity function. The resolution parameter for clustering was set at  $r = 1$ . The  
999 default Wilcoxon rank-sum test was used by running FindAllMarkers function in Seurat to find  
1000 differentially expressed markers in each cluster. Finally, each cell type was annotated after  
1001 extensive literature reading and searching for specific gene expression patterns. Violin plot  
1002 representations were used for visualizing expression of the different markers.

1003

#### 1004 **TCGA adrenocortical carcinoma data**

1005 TCGA gene expression and clinical ACC data were extracted from the TCGA database (The  
1006 Cancer Genome Atlas). Distribution in the good (C1B) and poor prognosis (C1A) groups were  
1007 previously defined, based on unsupervised clustering<sup>26</sup>. Expression data were standardized by  
1008 the Relative Standard Error of the Mean (RSEM) algorithm and transformed into Log2 in order  
1009 to refocus and symmetrize values' distribution. The macrophage signature was defined as the  
1010 mean expression (Z-score) of *CD74*, *CXCL2*, *CCL4*, *APOE*, *CCL3*, *CTSS*, *CIQA*, *CIQB*, *CIQC*  
1011 and *AIFI*. These were found as highly up-regulated genes in macrophages in single cell RNA  
1012 sequencing analyses of adult mouse adrenals<sup>73</sup> (see above). For gene set enrichment analyses,  
1013 TCGA ACC patients were dichotomized based on the expression of a phagocytic signature  
1014 (mean expression (Z-score) of *TYROBP*, *TREM2* and *CD68*) with patients classified as high  
1015 (expression above median) or low (expression below median). Differential gene expression  
1016 between patients from the phagocytic high and phagocytic low groups was computed using the

1017 *limma* R package. The volcano plot representing differential expression between these two  
1018 groups was generated in R with the *calibrate* library. Kaplan Meier analysis was conducted in  
1019 GraphPad prism after dichotomization of patients according to expression of the phagocytic  
1020 signature.

1021

### 1022 **Gene Set enrichment analyses**

1023 Gene set enrichment analyses were conducted on gene expression data from mouse models and  
1024 TCGA ACC patients, using GSEA 4.1.0 with gene sets from the MsigDB and MGI Gene  
1025 Ontology databases and with custom curated gene sets (Supplementary Table 5). Permutations  
1026 were set to 1000 and were performed on gene sets. Phagocytosis gene sets were curated from  
1027 an extensive search of the literature, including papers by Park et al.<sup>74</sup>, Lecoultre et al.<sup>75</sup> and  
1028 Janda et al.<sup>76</sup> and extracted from the MGI gene ontology database. Senescence gene sets were  
1029 extracted from papers by Eggert et al.<sup>32</sup>, Kuilman et al.<sup>77</sup>, özcan et al.<sup>78</sup>, Acosta et al.<sup>79</sup>, Fridman  
1030 et al.<sup>80</sup>, Coppé et al.<sup>81,82</sup>, Buhl et al.<sup>83</sup> and Saul et al.<sup>84</sup>. LM22 and ImmuCC gene sets were  
1031 derived from gene expression signatures published in Newman et al.<sup>85</sup> and Chen et al.<sup>86</sup>. To  
1032 reduce the gene expression matrix into simple gene identifier lists for GSEA, genes in each of  
1033 the lists were attributed to their cognate immune cell type based on their maximum of  
1034 expression across all cell types. This resulted in gene signatures for each immune cell type that  
1035 were then used in GSEA (Table). M0, M1 and M2 macrophages gene sets were further  
1036 concatenated to result in global LM22 and ImmuCC macrophages gene sets. The mouse adrenal  
1037 macrophages gene set was defined as the 100 most significantly upregulated genes within the  
1038 two macrophages clusters (compared to all other clusters) in our reanalysis of the single-cell  
1039 sequencing study of adult mouse adrenals by Lopez et al.<sup>73</sup>. The cytokine gene set was curated  
1040 from an extensive search of the literature. NFκB and DNA replication gene sets were extracted  
1041 from MsigDB C2, Hallmarks and C5 datasets.

1042 GSEA output was either displayed as dot plots or enrichment curves. Dot plots represent the  
1043 normalized enrichment score (NES) and FDR (size of dots defined as  $-\log_{10}(\text{FDR})$ ) and were  
1044 drawn using the *ggplot2* library in R. Enrichment curves were drawn by feeding GSEA output  
1045 to the *GSEA\_replot* R function, developed by Thomas Kuilman  
1046 (<https://github.com/PeeperLab/Rtoolbox/blob/master/R/ReplotGSEA.R>). Dot plots and  
1047 enrichment curves were further processed in Affinity Designer® for colour matching and  
1048 superimposition.

1049

### 1050 **CibersortX and mMCP analyses**

1051 CibersortX analyses were run on the CibersortX server (<https://cibersortx.stanford.edu>) using  
1052 the LM22 matrix and a mixture file representing gene expression data in control and *Znrf3 cKO*  
1053 adrenals at 4, 6 and 12 weeks or TCGA ACC patients' data, dichotomized on the basis of high  
1054 or low expression of the phagocytic signature (see TCGA adrenocortical carcinoma data).  
1055 Output of CibersortX was then processed in R to concatenate subpopulations of macrophages,  
1056 B cells, T-CD4, NK cells, DCs and mast cells. *Ggplot2* was then used to generate stacked bar  
1057 plots representing the percentage of each immune cell population. Statistical analyses between  
1058 genotypes or patients' groups were computed using the Mann-Whitney test.  
1059 mMCP analyses were run in R using the mMCP counter package ([https://github.com/cit-](https://github.com/cit-bioinfo/mMCP-counter)  
1060 [bioinfo/mMCP-counter](https://github.com/cit-bioinfo/mMCP-counter)), following instructions in Petitprez et al.<sup>87</sup> Stacked bar plots were  
1061 generated by *ggplot2* and statistical analyses conducted as above.

1062

### 1063 **Statistical analyses**

1064 Minimal sample size was set at n=3 allowing for detection of 40% increases/decreases with  
1065  $\alpha=0.05$ ,  $\delta=0.4$  and  $sd=1.0$ . Statistical analyses were conducted with R and GraphPad Prism 9.  
1066 Normality of data was assessed using D'Agostino & Pearson normality test. Statistical analysis  
1067 of normally distributed data was performed by two-tailed Student's *t*-test (two groups) with or  
1068 without Welch's correction (as a function of variance) or one-way ANOVA (multiple groups),  
1069 followed by Tukey's multiple comparisons test. Analysis of non-normally distributed data was  
1070 performed by two-tailed Mann & Whitney test (two groups) or Kruskal-Wallis test followed by  
1071 Dunn's multiple comparisons test (multiple groups). All bars represent the mean  $\pm$  SEM.

### 1072 **References**

- 1073 1. Dart, A. Sexual dimorphism in cancer. *Nat. Rev. Cancer* **20**, 627 (2020).
- 1074 2. Clocchiatti, A., Cora, E., Zhang, Y. & Dotto, G. P. Sexual dimorphism in cancer. *Nat.*  
1075 *Rev. Cancer* **16**, 330–339 (2016).
- 1076 3. Audenet, F., Méjean, A., Chartier-Kastler, E. & Rouprêt, M. Adrenal tumours are  
1077 more predominant in females regardless of their histological subtype: a review. *World J. Urol.*  
1078 **31**, 1037–1043 (2013).
- 1079 4. Else, T. *et al.* Adrenocortical Carcinoma. *Endocr. Rev.* **35**, 282–326 (2014).
- 1080 5. Lyraki, R. & Schedl, A. The Sexually Dimorphic Adrenal Cortex: Implications for  
1081 Adrenal Disease. *Int. J. Mol. Sci.* **22**, 4889 (2021).
- 1082 6. Ayala-Ramirez, M. *et al.* Adrenocortical carcinoma: clinical outcomes and prognosis  
1083 of 330 patients at a tertiary care center. *Eur. J. Endocrinol.* **169**, 891–899 (2013).
- 1084 7. Kang, T.-W. *et al.* Senescence surveillance of pre-malignant hepatocytes limits liver  
1085 cancer development. *Nature* **479**, 547–551 (2011).
- 1086 8. Dumontet, T. *et al.* PKA signaling drives reticularis differentiation and sexually  
1087 dimorphic adrenal cortex renewal. *JCI Insight* **3**, (2018).
- 1088 9. Grabek, A. *et al.* The Adult Adrenal Cortex Undergoes Rapid Tissue Renewal in a

- 1089 Sex-Specific Manner. *Cell Stem Cell* **25**, 290-296.e2 (2019).
- 1090 10. Baudin, E. & Endocrine Tumor Board of Gustave Roussy. Adrenocortical carcinoma.
- 1091 *Endocrinol. Metab. Clin. North Am.* **44**, 411–434 (2015).
- 1092 11. Sada, A. *et al.* Comparison between functional and non-functional adrenocortical
- 1093 carcinoma. *Surgery* **167**, 216–223 (2020).
- 1094 12. Shariq, O. A. & McKenzie, T. J. Adrenocortical carcinoma: current state of the art,
- 1095 ongoing controversies, and future directions in diagnosis and treatment. *Ther. Adv. Chronic*
- 1096 *Dis.* **12**, 20406223211033104 (2021).
- 1097 13. Fassnacht, M. *et al.* Combination chemotherapy in advanced adrenocortical
- 1098 carcinoma. *N. Engl. J. Med.* **366**, 2189–2197 (2012).
- 1099 14. Lo Iacono, M. *et al.* Molecular Mechanisms of Mitotane Action in Adrenocortical
- 1100 Cancer Based on In Vitro Studies. *Cancers* **13**, 5255 (2021).
- 1101 15. Puglisi, S. *et al.* New perspectives for mitotane treatment of adrenocortical carcinoma.
- 1102 *Best Pract. Res. Clin. Endocrinol. Metab.* **34**, 101415 (2020).
- 1103 16. Terzolo, M. *et al.* Adjuvant mitotane treatment for adrenocortical carcinoma. *N. Engl.*
- 1104 *J. Med.* **356**, 2372–2380 (2007).
- 1105 17. Berruti, A. *et al.* Long-Term Outcomes of Adjuvant Mitotane Therapy in Patients
- 1106 With Radically Resected Adrenocortical Carcinoma. *J. Clin. Endocrinol. Metab.* **102**, 1358–
- 1107 1365 (2017).
- 1108 18. Calabrese, A. *et al.* Adjuvant mitotane therapy is beneficial in non-metastatic
- 1109 adrenocortical carcinoma at high risk of recurrence. *Eur. J. Endocrinol.* **180**, 387–396 (2019).
- 1110 19. Le Tourneau, C. *et al.* Avelumab in patients with previously treated metastatic
- 1111 adrenocortical carcinoma: phase 1b results from the JAVELIN solid tumor trial. *J.*
- 1112 *Immunother. Cancer* **6**, 111 (2018).
- 1113 20. Carneiro, B. A. *et al.* Nivolumab in Metastatic Adrenocortical Carcinoma: Results of a
- 1114 Phase 2 Trial. *J. Clin. Endocrinol. Metab.* **104**, 6193–6200 (2019).
- 1115 21. Habra, M. A. *et al.* Phase II clinical trial of pembrolizumab efficacy and safety in
- 1116 advanced adrenocortical carcinoma. *J. Immunother. Cancer* **7**, 253 (2019).
- 1117 22. Raj, N. *et al.* PD-1 Blockade in Advanced Adrenocortical Carcinoma. *J. Clin. Oncol.*
- 1118 *Off. J. Am. Soc. Clin. Oncol.* **38**, 71–80 (2020).
- 1119 23. Thorsson, V. *et al.* The Immune Landscape of Cancer. *Immunity* **51**, 411–412 (2019).
- 1120 24. Landwehr, L.-S. *et al.* Interplay between glucocorticoids and tumor-infiltrating
- 1121 lymphocytes on the prognosis of adrenocortical carcinoma. *J. Immunother. Cancer* **8**,
- 1122 e000469 (2020).
- 1123 25. Assié, G. *et al.* Integrated genomic characterization of adrenocortical carcinoma. *Nat.*
- 1124 *Genet.* (2014) doi:10.1038/ng.2953.
- 1125 26. Zheng, S. *et al.* Comprehensive Pan-Genomic Characterization of Adrenocortical
- 1126 Carcinoma. *Cancer Cell* **29**, 723–736 (2016).
- 1127 27. Koo, B.-K. *et al.* Tumour suppressor RNF43 is a stem-cell E3 ligase that induces
- 1128 endocytosis of Wnt receptors. *Nature* **488**, 665–669 (2012).
- 1129 28. Hao, H.-X. *et al.* ZNRF3 promotes Wnt receptor turnover in an R-spondin-sensitive
- 1130 manner. *Nature* **485**, 195–200 (2012).
- 1131 29. Basham, K. J. *et al.* A ZNRF3-dependent Wnt/ $\beta$ -catenin signaling gradient is required
- 1132 for adrenal homeostasis. *Genes Dev.* **33**, 209–220 (2019).
- 1133 30. Lucas, M. *et al.* Massive inflammatory syndrome and lymphocytic immunodeficiency
- 1134 in KARAP/DAP12-transgenic mice. *Eur. J. Immunol.* **32**, 2653–2663 (2002).
- 1135 31. Helming, L. *et al.* Essential role of DAP12 signaling in macrophage programming into
- 1136 a fusion-competent state. *Sci. Signal.* **1**, ra11 (2008).
- 1137 32. Eggert, T. *et al.* Distinct Functions of Senescence-Associated Immune Responses in
- 1138 Liver Tumor Surveillance and Tumor Progression. *Cancer Cell* **30**, 533–547 (2016).



- 1139 33. Truman, L. A. *et al.* CX3CL1/fractalkine is released from apoptotic lymphocytes to  
1140 stimulate macrophage chemotaxis. *Blood* **112**, 5026–5036 (2008).
- 1141 34. Yang, L. V., Radu, C. G., Wang, L., Riedinger, M. & Witte, O. N. Gi-independent  
1142 macrophage chemotaxis to lysophosphatidylcholine via the immunoregulatory GPCR G2A.  
1143 *Blood* **105**, 1127–1134 (2005).
- 1144 35. Lemke, G. How macrophages deal with death. *Nat. Rev. Immunol.* **19**, 539–549  
1145 (2019).
- 1146 36. Galvan, M. D., Greenlee-Wacker, M. C. & Bohlsion, S. S. C1q and phagocytosis: the  
1147 perfect complement to a good meal. *J. Leukoc. Biol.* **92**, 489–497 (2012).
- 1148 37. Chen, J. *et al.* SLAMF7 is critical for phagocytosis of haematopoietic tumour cells via  
1149 Mac-1 integrin. *Nature* **544**, 493–497 (2017).
- 1150 38. Cockram, T. O. J., Dundee, J. M., Popescu, A. S. & Brown, G. C. The Phagocytic  
1151 Code Regulating Phagocytosis of Mammalian Cells. *Front. Immunol.* **12**, 2144 (2021).
- 1152 39. Hanayama, R. *et al.* Autoimmune disease and impaired uptake of apoptotic cells in  
1153 MFG-E8-deficient mice. *Science* **304**, 1147–1150 (2004).
- 1154 40. Atagi, Y. *et al.* Apolipoprotein E Is a Ligand for Triggering Receptor Expressed on  
1155 Myeloid Cells 2 (TREM2). *J. Biol. Chem.* **290**, 26043–26050 (2015).
- 1156 41. Nugent, A. A. *et al.* TREM2 Regulates Microglial Cholesterol Metabolism upon  
1157 Chronic Phagocytic Challenge. *Neuron* **105**, 837-854.e9 (2020).
- 1158 42. Lu, Q. *et al.* Tyro-3 family receptors are essential regulators of mammalian  
1159 spermatogenesis. *Nature* **398**, 723–728 (1999).
- 1160 43. Caberoy, N. B., Alvarado, G., Bigcas, J.-L. & Li, W. Galectin-3 is a new MerTK-  
1161 specific eat-me signal. *J. Cell. Physiol.* **227**, 401–407 (2012).
- 1162 44. Meyer, P. *et al.* A model of the onset of the senescence associated secretory phenotype  
1163 after DNA damage induced senescence. *PLoS Comput. Biol.* **13**, e1005741 (2017).
- 1164 45. Salminen, A., Kauppinen, A. & Kaarniranta, K. Emerging role of NF- $\kappa$ B signaling in  
1165 the induction of senescence-associated secretory phenotype (SASP). *Cell. Signal.* **24**, 835–  
1166 845 (2012).
- 1167 46. Vesely, M. D., Kershaw, M. H., Schreiber, R. D. & Smyth, M. J. Natural innate and  
1168 adaptive immunity to cancer. *Annu. Rev. Immunol.* **29**, 235–271 (2011).
- 1169 47. Cheng, S. *et al.* A pan-cancer single-cell transcriptional atlas of tumor infiltrating  
1170 myeloid cells. *Cell* **184**, 792-809.e23 (2021).
- 1171 48. Xue, W. *et al.* Senescence and tumour clearance is triggered by p53 restoration in  
1172 murine liver carcinomas. *Nature* **445**, 656–660 (2007).
- 1173 49. Pittet, M. J., Michielin, O. & Migliorini, D. Clinical relevance of tumour-associated  
1174 macrophages. *Nat. Rev. Clin. Oncol.* (2022) doi:10.1038/s41571-022-00620-6.
- 1175 50. Zhang, L. *et al.* Single-Cell Analyses Inform Mechanisms of Myeloid-Targeted  
1176 Therapies in Colon Cancer. *Cell* **181**, 442-459.e29 (2020).
- 1177 51. Weiskopf, K. *et al.* CD47-blocking immunotherapies stimulate macrophage-mediated  
1178 destruction of small-cell lung cancer. *J. Clin. Invest.* **126**, 2610–2620 (2016).
- 1179 52. von Roemeling, C. A. *et al.* Therapeutic modulation of phagocytosis in glioblastoma  
1180 can activate both innate and adaptive antitumour immunity. *Nat. Commun.* **11**, 1508 (2020).
- 1181 53. Sun, L. *et al.* Activating a collaborative innate-adaptive immune response to control  
1182 metastasis. *Cancer Cell* **39**, 1361-1374.e9 (2021).
- 1183 54. Diaz-Jimenez, D., Kolb, J. P. & Cidlowski, J. A. Glucocorticoids as Regulators of  
1184 Macrophage-Mediated Tissue Homeostasis. *Front. Immunol.* **12**, 669891 (2021).
- 1185 55. Milde, R. *et al.* Multinucleated Giant Cells Are Specialized for Complement-Mediated  
1186 Phagocytosis and Large Target Destruction. *Cell Rep.* **13**, 1937–1948 (2015).
- 1187 56. Helming, L. & Gordon, S. Molecular mediators of macrophage fusion. *Trends Cell*  
1188 *Biol.* **19**, 514–522 (2009).



- 1189 57. de Medeiros, V. A. *et al.* Absence of multinucleated giant cell reaction as an indicator  
1190 of tumor progression in oral tongue squamous cell carcinoma. *Eur. Arch. Oto-Rhino-*  
1191 *Laryngol. Off. J. Eur. Fed. Oto-Rhino-Laryngol. Soc. EUFOS Affil. Ger. Soc. Oto-Rhino-*  
1192 *Laryngol. - Head Neck Surg.* (2021) doi:10.1007/s00405-021-07139-z.
- 1193 58. Brooks, E., Simmons-Arnold, L., Naud, S., Evans, M. F. & Elhosseiny, A.  
1194 Multinucleated giant cells' incidence, immune markers, and significance: a study of 172 cases  
1195 of papillary thyroid carcinoma. *Head Neck Pathol.* **3**, 95–99 (2009).
- 1196 59. Lösslein, A. K. *et al.* Monocyte progenitors give rise to multinucleated giant cells.  
1197 *Nat. Commun.* **12**, 2027 (2021).
- 1198 60. Gal-Oz, S. T. *et al.* ImmGen report: sexual dimorphism in the immune system  
1199 transcriptome. *Nat. Commun.* **10**, 4295 (2019).
- 1200 61. Thion, M. S. *et al.* Microbiome Influences Prenatal and Adult Microglia in a Sex-  
1201 Specific Manner. *Cell* **172**, 500-516.e16 (2018).
- 1202 62. Hanamsagar, R. *et al.* Generation of a microglial developmental index in mice and in  
1203 humans reveals a sex difference in maturation and immune reactivity. *Glia* **65**, 1504–1520  
1204 (2017).
- 1205 63. Bain, C. C. *et al.* Rate of replenishment and microenvironment contribute to the  
1206 sexually dimorphic phenotype and function of peritoneal macrophages. *Sci. Immunol.* **5**,  
1207 (2020).
- 1208 64. Klein, S. L. & Flanagan, K. L. Sex differences in immune responses. *Nat. Rev.*  
1209 *Immunol.* **16**, 626–638 (2016).
- 1210 65. Scotland, R. S., Stables, M. J., Madalli, S., Watson, P. & Gilroy, D. W. Sex  
1211 differences in resident immune cell phenotype underlie more efficient acute inflammatory  
1212 responses in female mice. *Blood* **118**, 5918–5927 (2011).
- 1213 66. Mirochnik, Y. *et al.* Androgen receptor drives cellular senescence. *PLoS One* **7**, e31052  
1214 (2012).
- 1215 67. Mirzakhani, K. *et al.* The androgen receptor-lncRNASAT1-AKT-p15 axis mediates  
1216 androgen-induced cellular senescence in prostate cancer cells. *Oncogene* **41**, 943–959 (2022).
- 1217 68. Leng, S. *et al.*  $\beta$ -Catenin and FGFR2 regulate postnatal rosette-based adrenocortical  
1218 morphogenesis. *Nat. Commun.* **11**, 1680 (2020).
- 1219 69. Belenguer, G. *et al.* RNF43/ZNRF3 loss predisposes to hepatocellular-carcinoma by  
1220 impairing liver regeneration and altering the liver lipid metabolic ground-state. *Nat. Commun.*  
1221 **13**, 334 (2022).
- 1222 70. Bingham, N. C., Verma-Kurvari, S., Parada, L. F. & Parker, K. L. Development of a  
1223 steroidogenic factor 1/Cre transgenic mouse line. *Genesis* **44**, 419–24 (2006).
- 1224 71. Xiang, X. *et al.* TREM2 deficiency reduces the efficacy of immunotherapeutic  
1225 amyloid clearance. *EMBO Mol. Med.* **8**, 992–1004 (2016).
- 1226 72. R, S., Ja, F., D, G., Af, S. & A, R. Spatial reconstruction of single-cell gene expression  
1227 data. *Nat. Biotechnol.* **33**, (2015).
- 1228 73. Lopez, J. P. *et al.* Single-cell molecular profiling of all three components of the HPA  
1229 axis reveals adrenal ABCB1 as a regulator of stress adaptation. *Sci. Adv.* **7**, (2021).
- 1230 74. Park, S.-Y. & Kim, I.-S. Engulfment signals and the phagocytic machinery for  
1231 apoptotic cell clearance. *Exp. Mol. Med.* **49**, e331 (2017).
- 1232 75. Lecoultre, M., Dutoit, V. & Walker, P. R. Phagocytic function of tumor-associated  
1233 macrophages as a key determinant of tumor progression control: a review. *J. Immunother.*  
1234 *Cancer* **8**, e001408 (2020).
- 1235 76. Janda, E., Boi, L. & Carta, A. R. Microglial Phagocytosis and Its Regulation: A  
1236 Therapeutic Target in Parkinson's Disease? *Front. Mol. Neurosci.* **11**, (2018).
- 1237 77. Kuilman, T. *et al.* Oncogene-induced senescence relayed by an interleukin-dependent  
1238 inflammatory network. *Cell* **133**, 1019–1031 (2008).

- 1239 78. Özcan, S. *et al.* Unbiased analysis of senescence associated secretory phenotype  
1240 (SASP) to identify common components following different genotoxic stresses. *Aging* **8**,  
1241 1316–1329 (2016).
- 1242 79. Acosta, J. C. *et al.* A complex secretory program orchestrated by the inflammasome  
1243 controls paracrine senescence. *Nat. Cell Biol.* **15**, 978–990 (2013).
- 1244 80. Fridman, A. L. & Tainsky, M. A. Critical pathways in cellular senescence and  
1245 immortalization revealed by gene expression profiling. *Oncogene* **27**, 5975–5987 (2008).
- 1246 81. Coppé, J.-P. *et al.* Senescence-associated secretory phenotypes reveal cell-  
1247 nonautonomous functions of oncogenic RAS and the p53 tumor suppressor. *PLoS Biol.* **6**,  
1248 2853–2868 (2008).
- 1249 82. Coppé, J.-P., Desprez, P.-Y., Krtolica, A. & Campisi, J. The senescence-associated  
1250 secretory phenotype: the dark side of tumor suppression. *Annu. Rev. Pathol.* **5**, 99–118  
1251 (2010).
- 1252 83. Buhl, J. L. *et al.* The Senescence-associated Secretory Phenotype Mediates Oncogene-  
1253 induced Senescence in Pediatric Pilocytic Astrocytoma. *Clin. Cancer Res. Off. J. Am. Assoc.*  
1254 *Cancer Res.* **25**, 1851–1866 (2019).
- 1255 84. Saul, D. *et al.* A New Gene Set Identifies Senescent Cells and Predicts Senescence-  
1256 Associated Pathways Across Tissues. 2021.12.10.472095 (2021)  
1257 doi:10.1101/2021.12.10.472095.
- 1258 85. Newman, A. M. *et al.* Robust enumeration of cell subsets from tissue expression  
1259 profiles. *Nat. Methods* **12**, 453–457 (2015).
- 1260 86. Chen, Z. *et al.* seq-ImmuCC: Cell-Centric View of Tissue Transcriptome Measuring  
1261 Cellular Compositions of Immune Microenvironment From Mouse RNA-Seq Data. *Front.*  
1262 *Immunol.* **9**, 1286 (2018).
- 1263 87. Petitprez, F. *et al.* The murine Microenvironment Cell Population counter method to  
1264 estimate abundance of tissue-infiltrating immune and stromal cell populations in murine  
1265 samples using gene expression. *Genome Med.* **12**, 86 (2020).

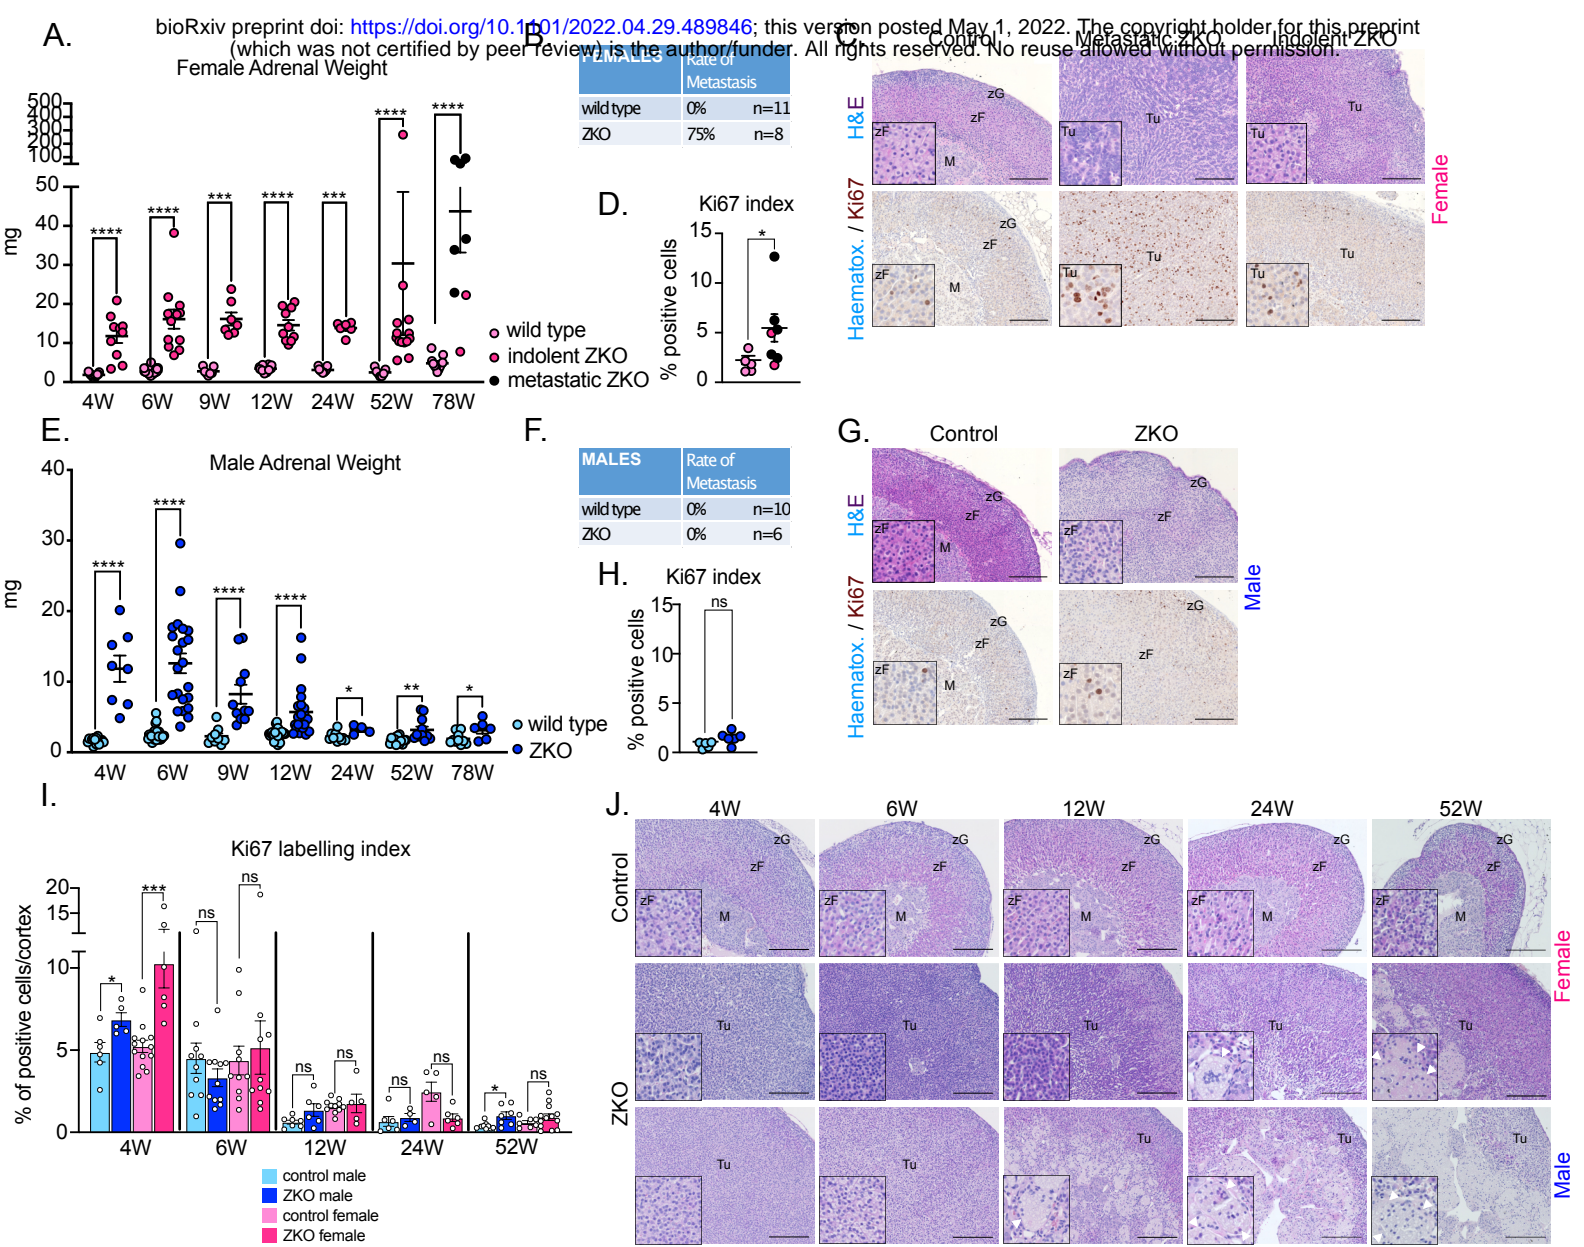

**Figure 1**



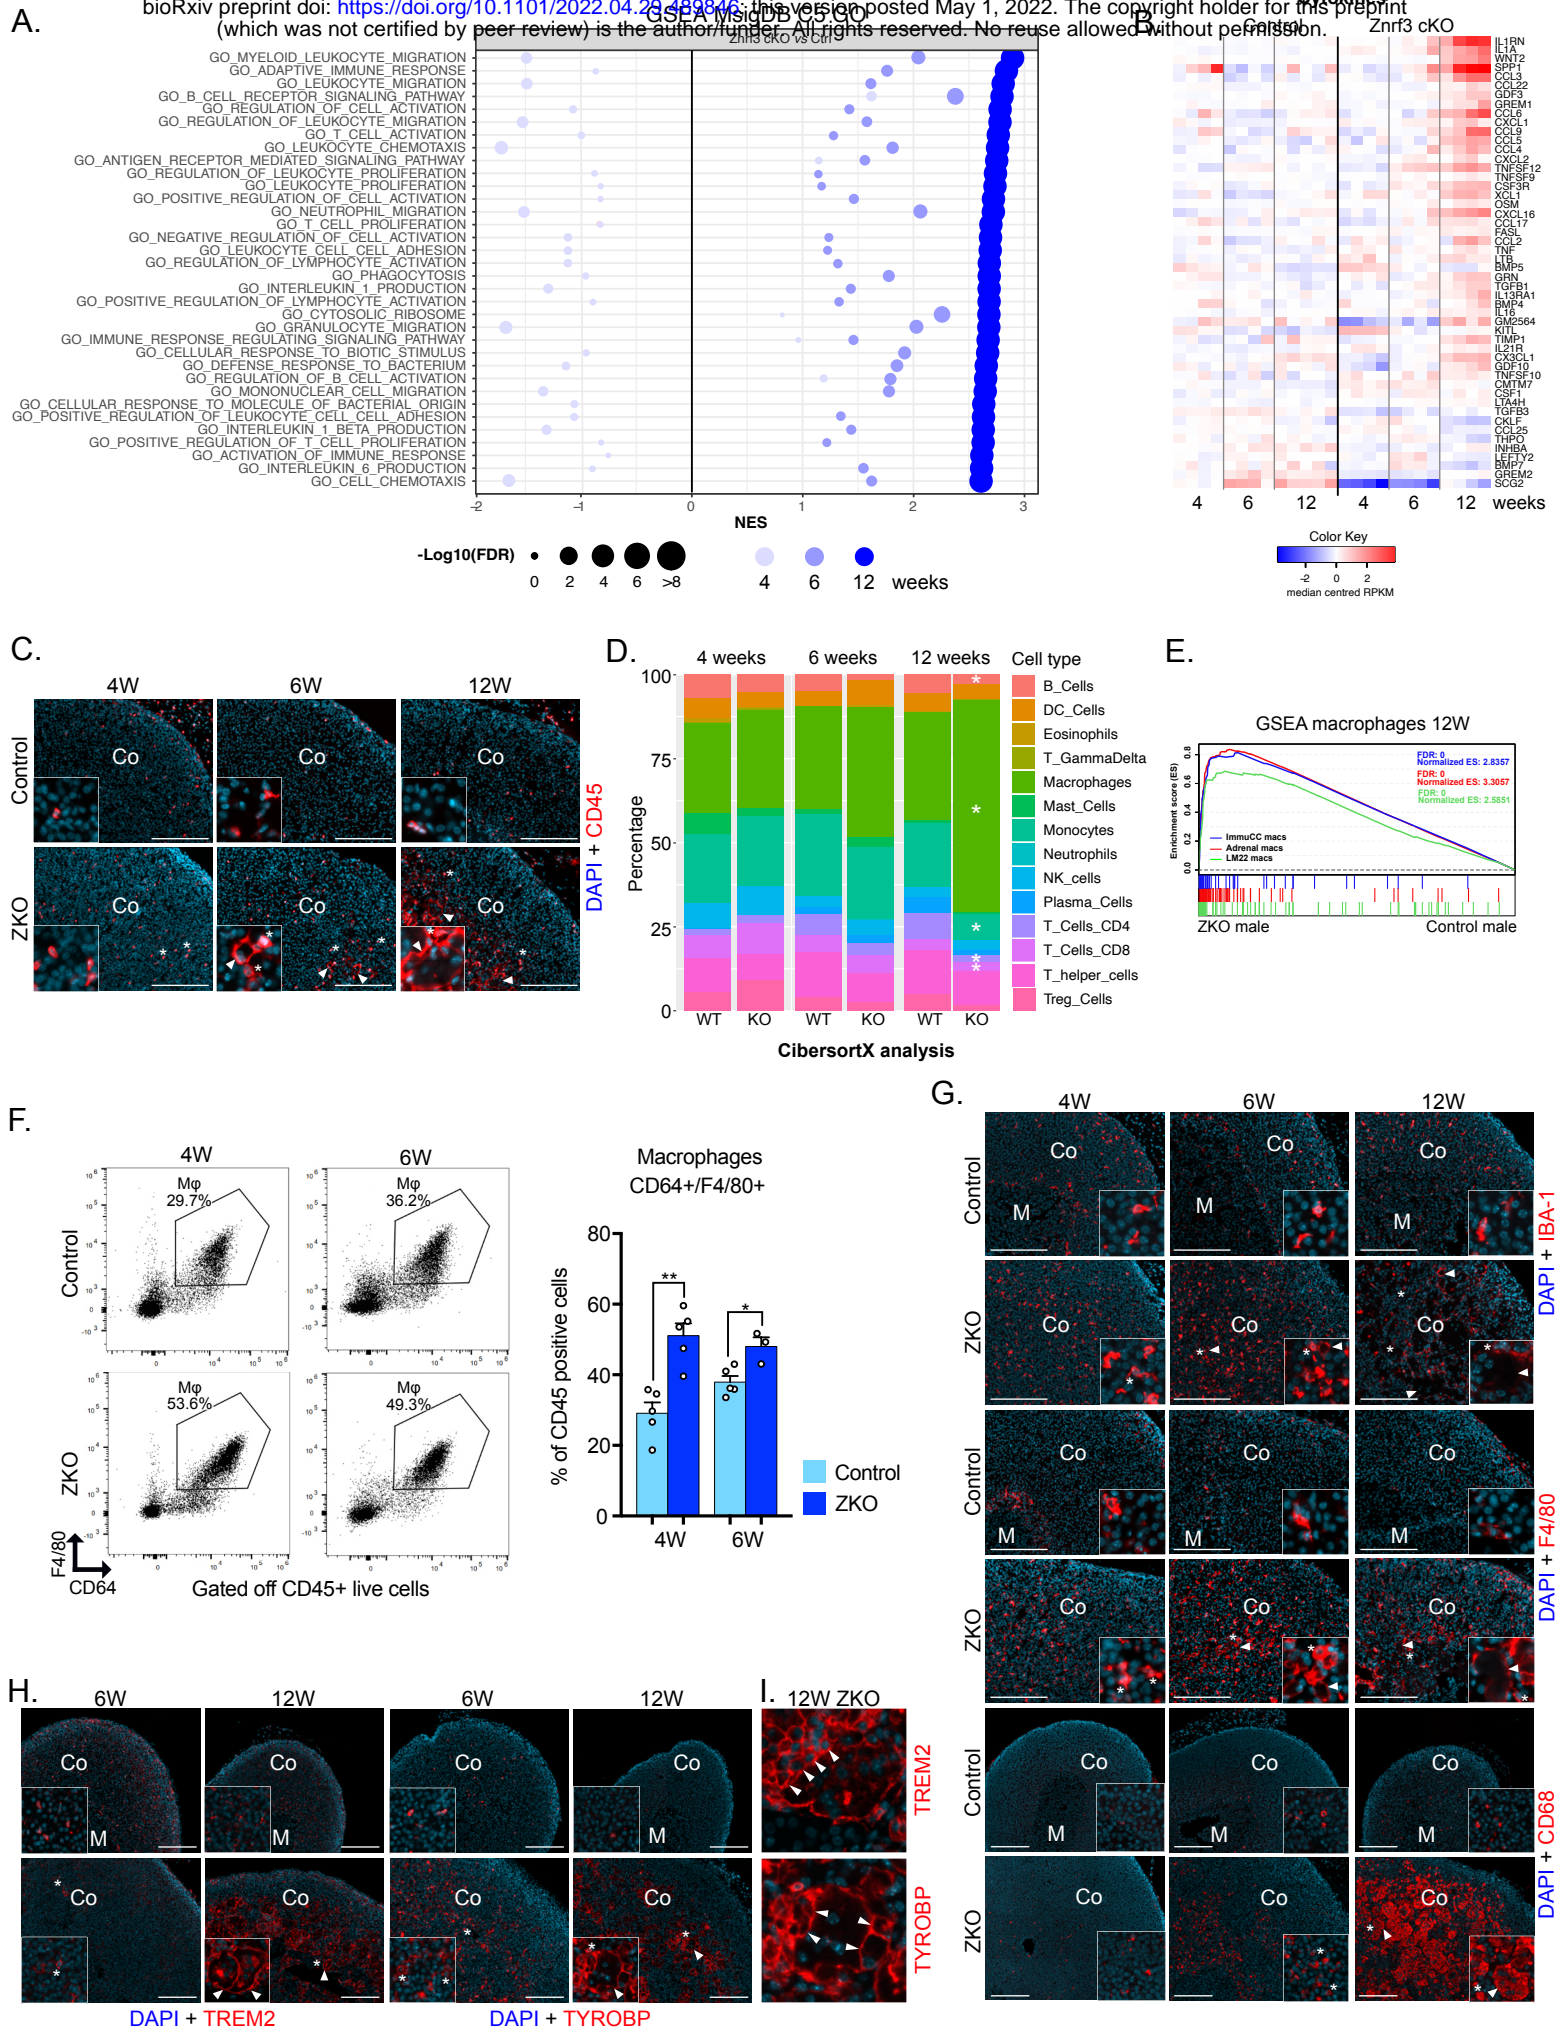

Figure 2

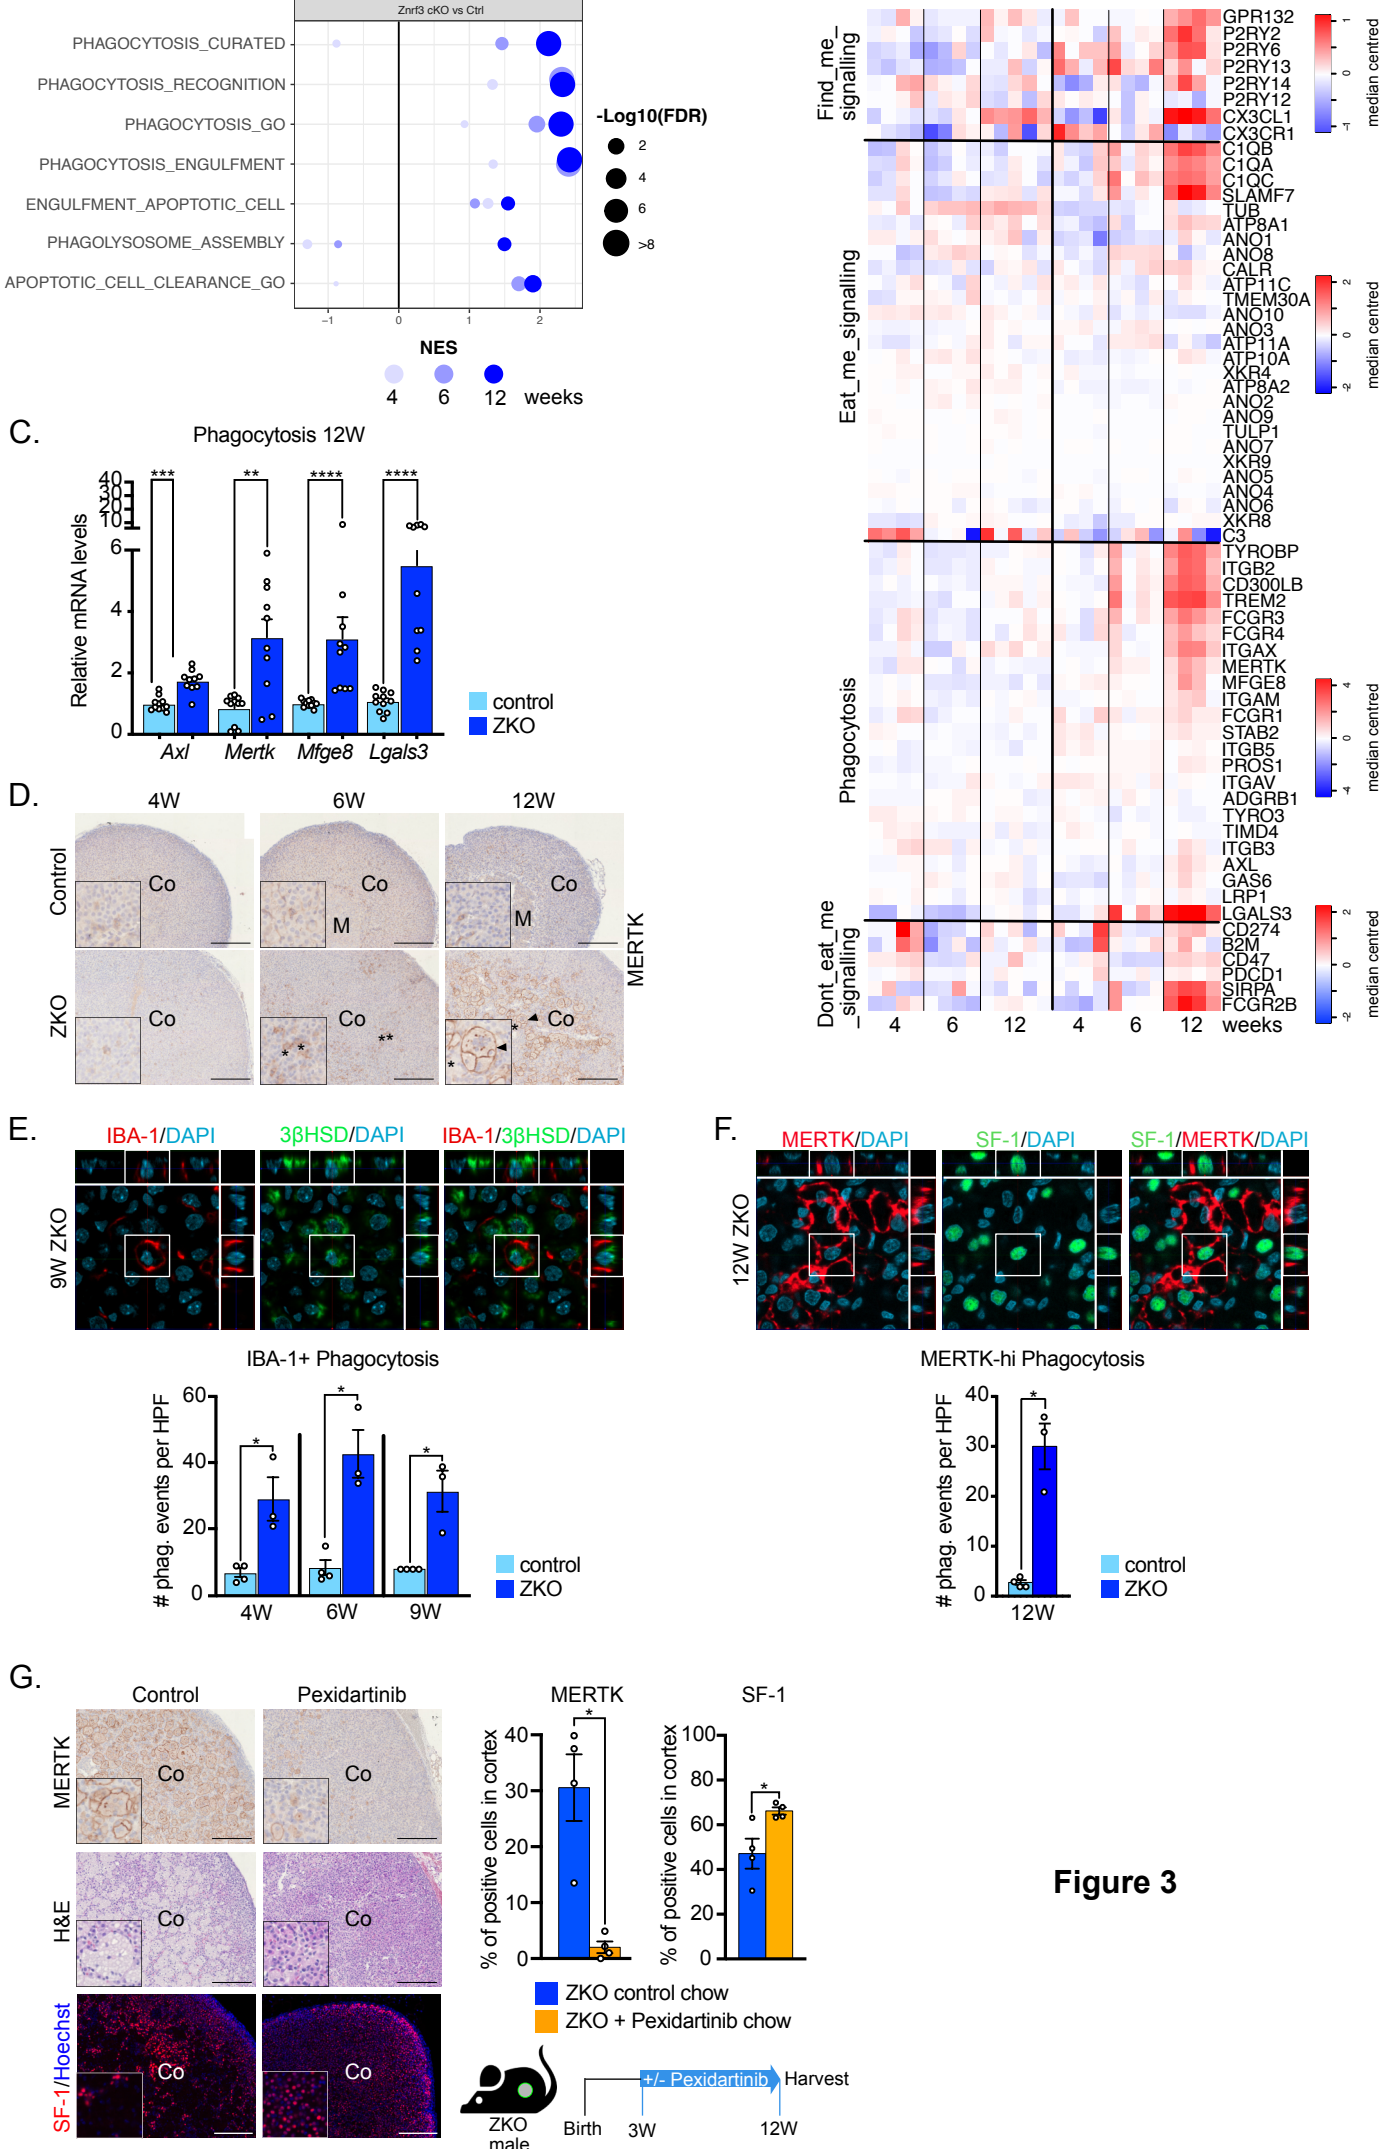

**Figure 3**



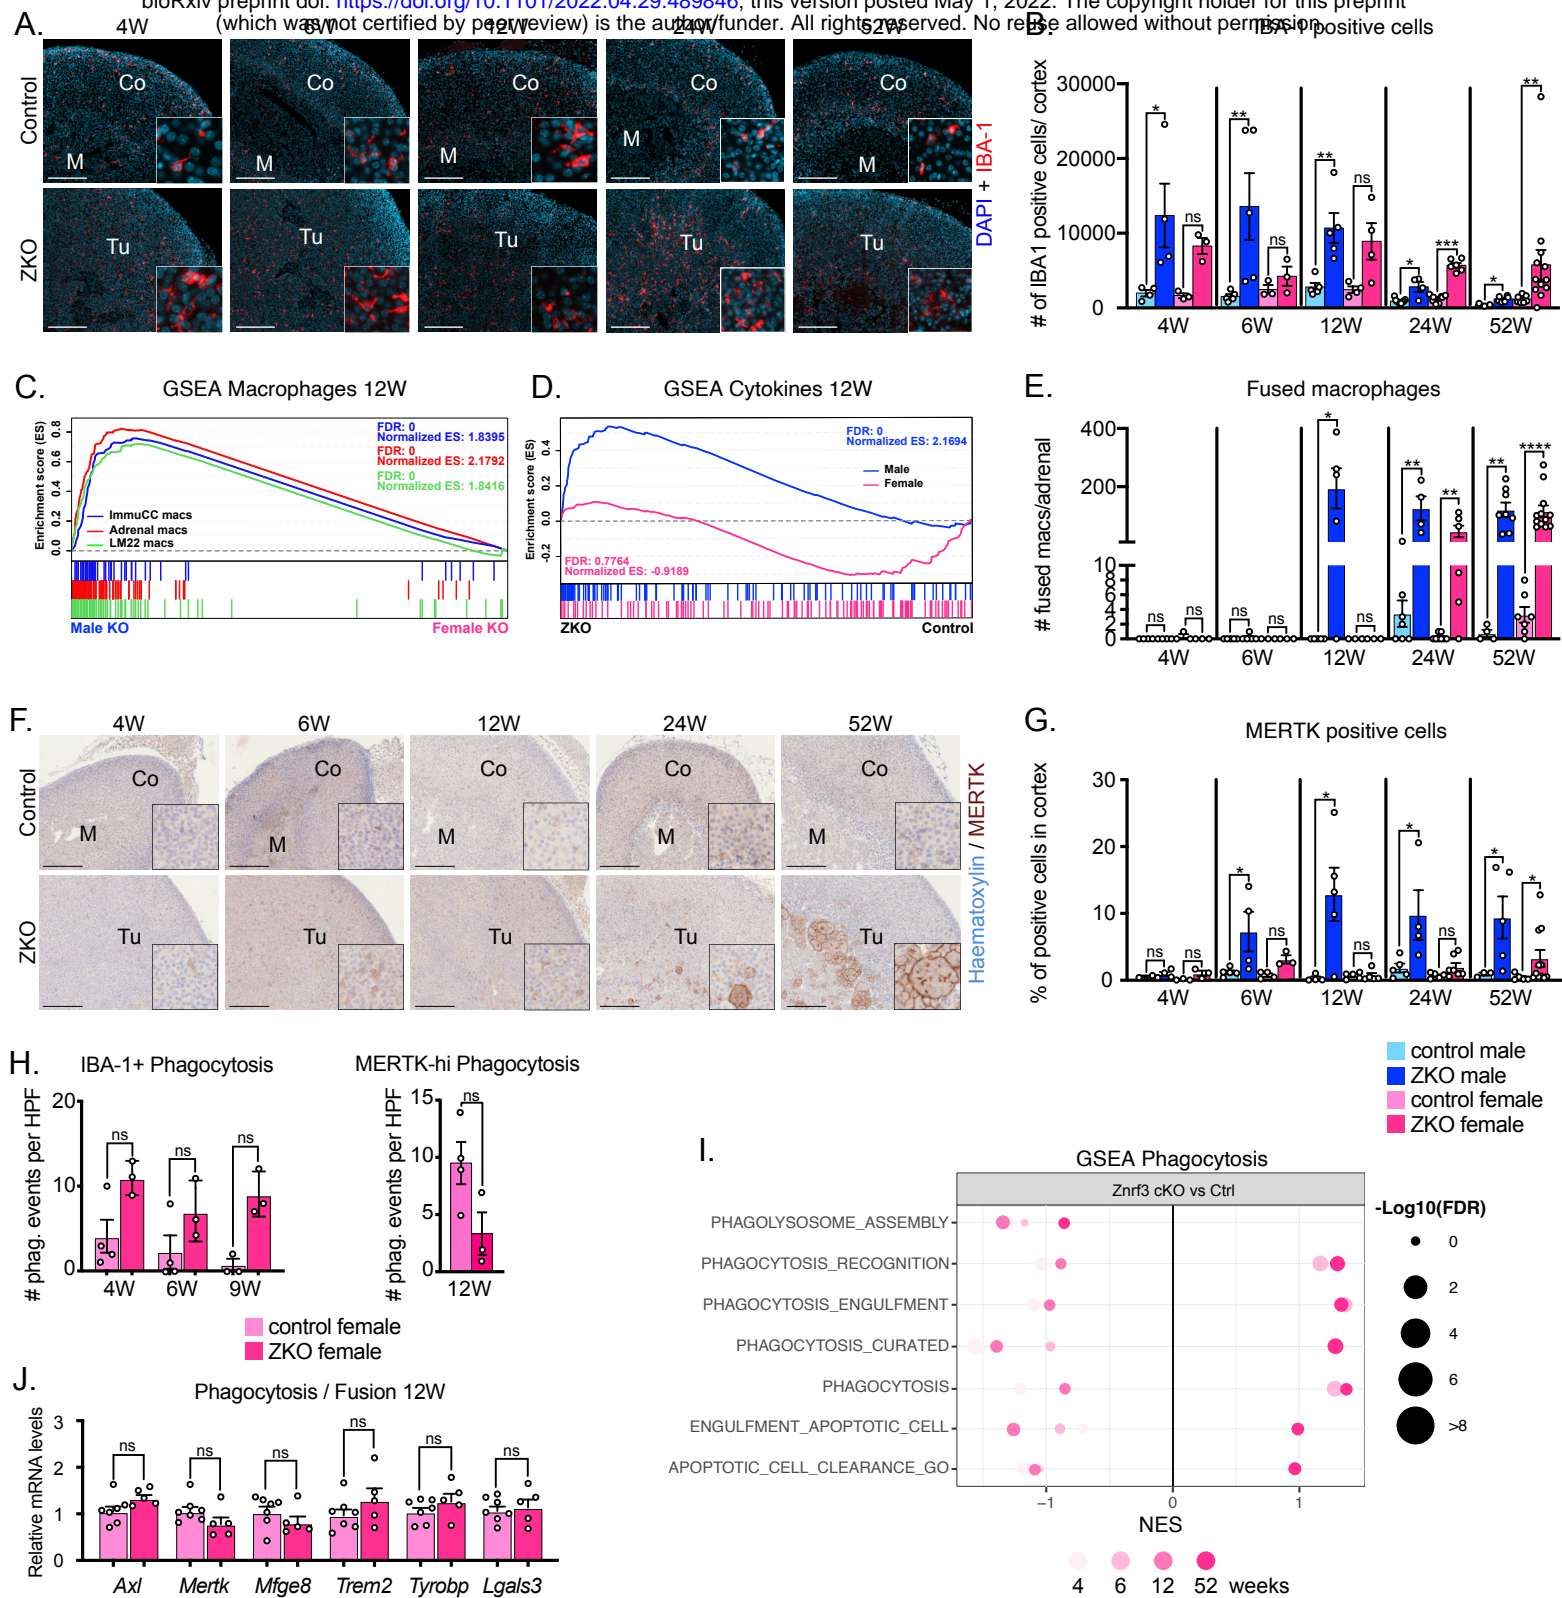

**Figure 4**



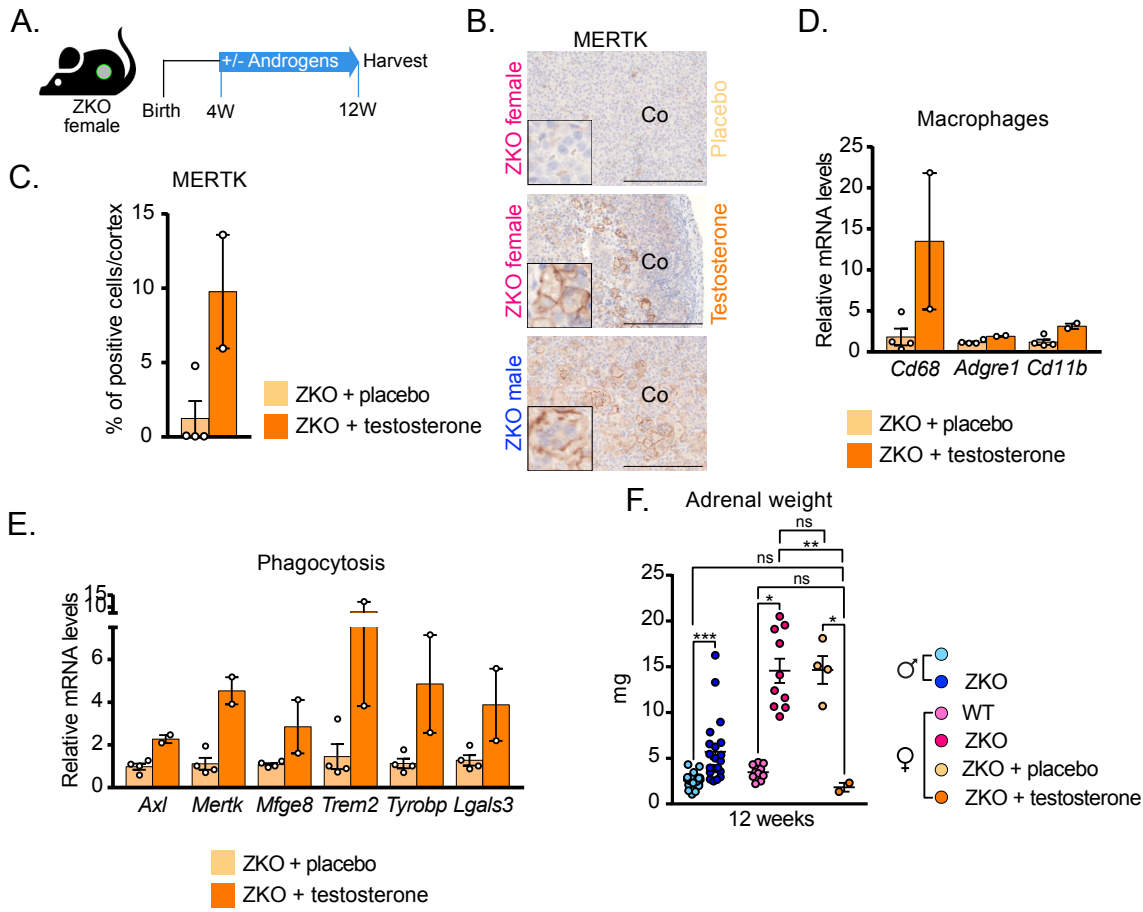

**Figure 5**

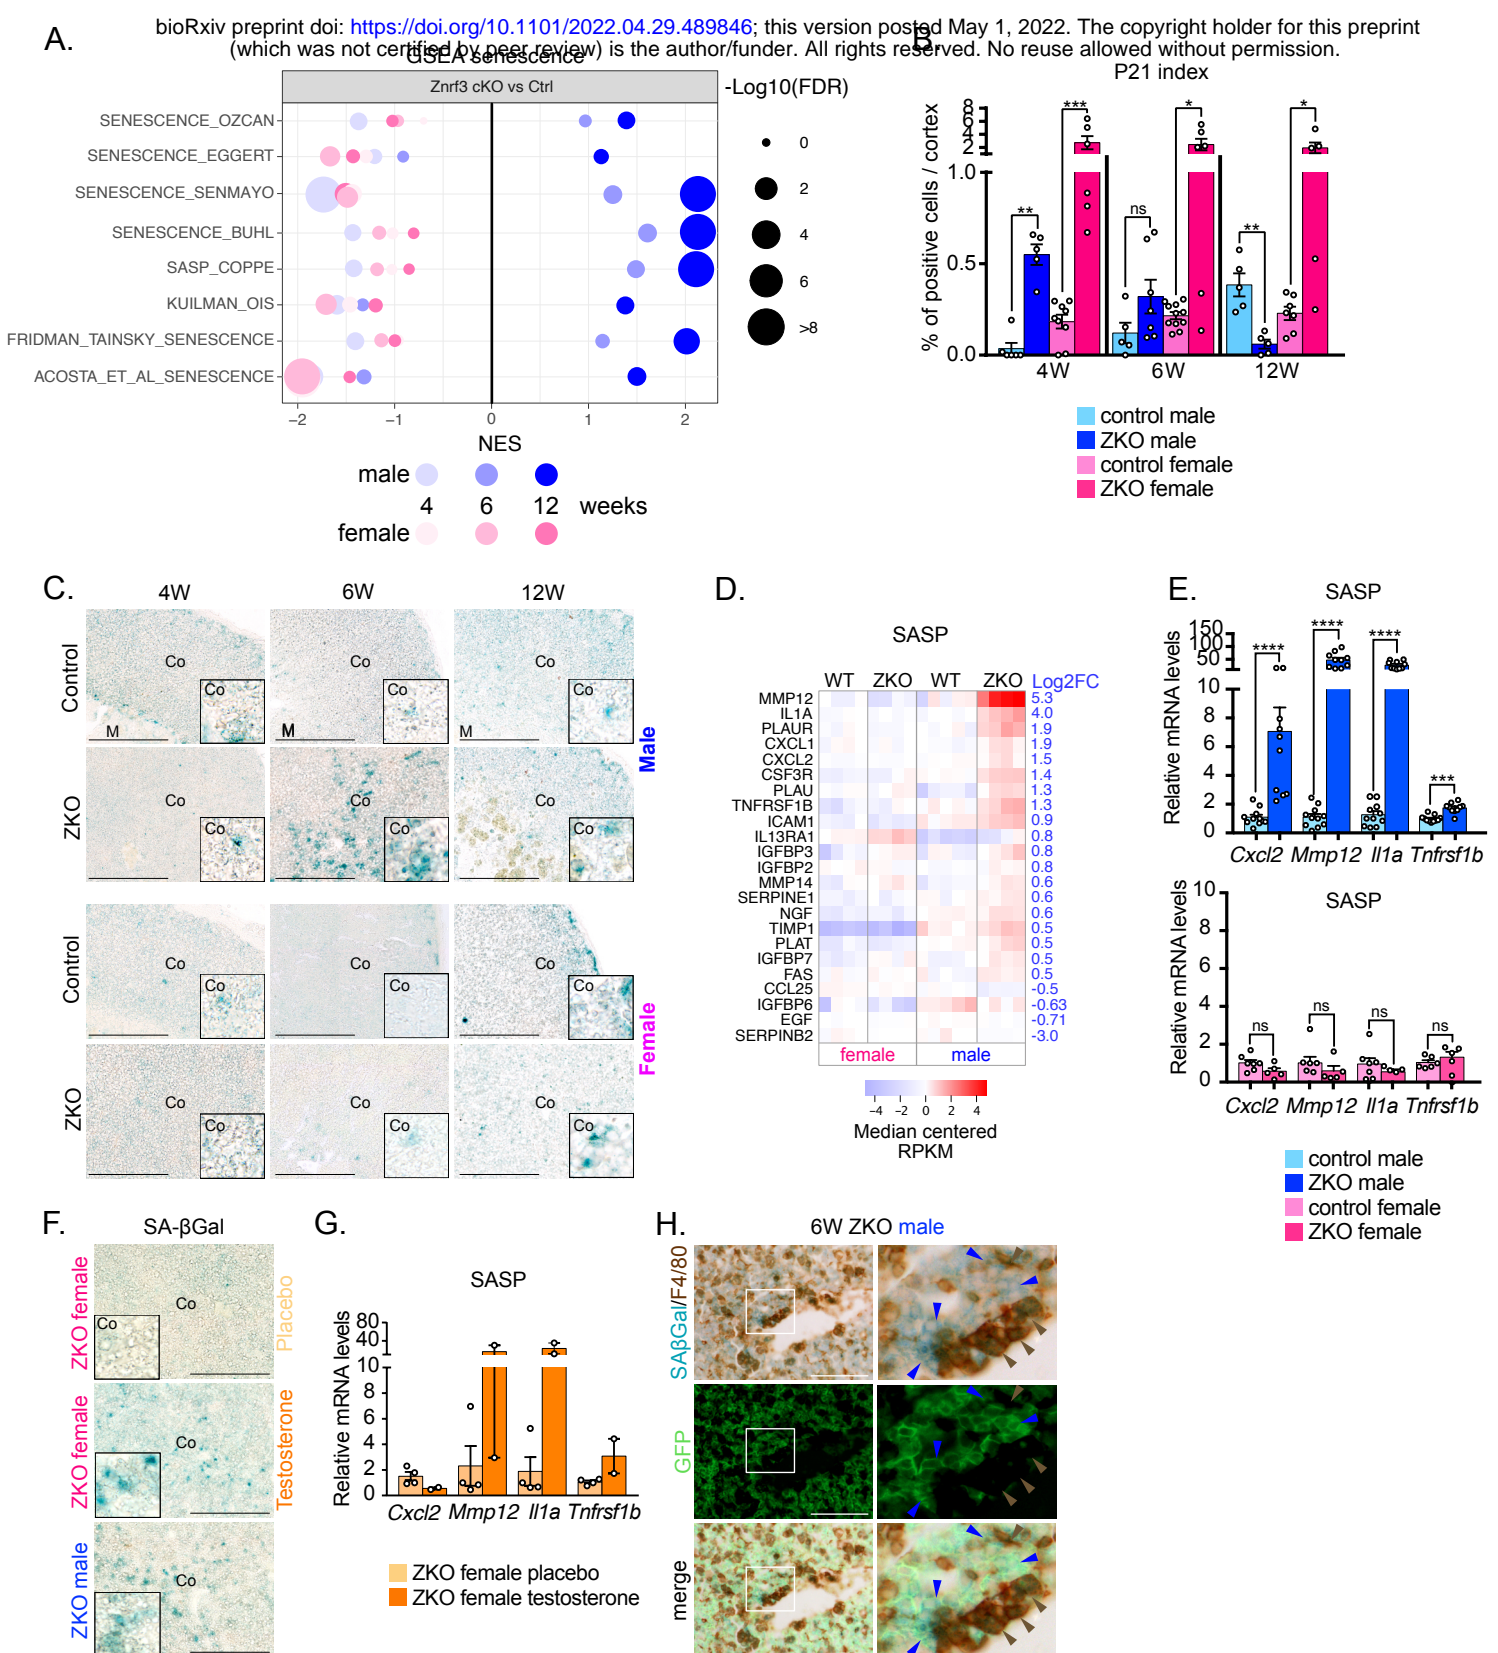

**Figure 6**

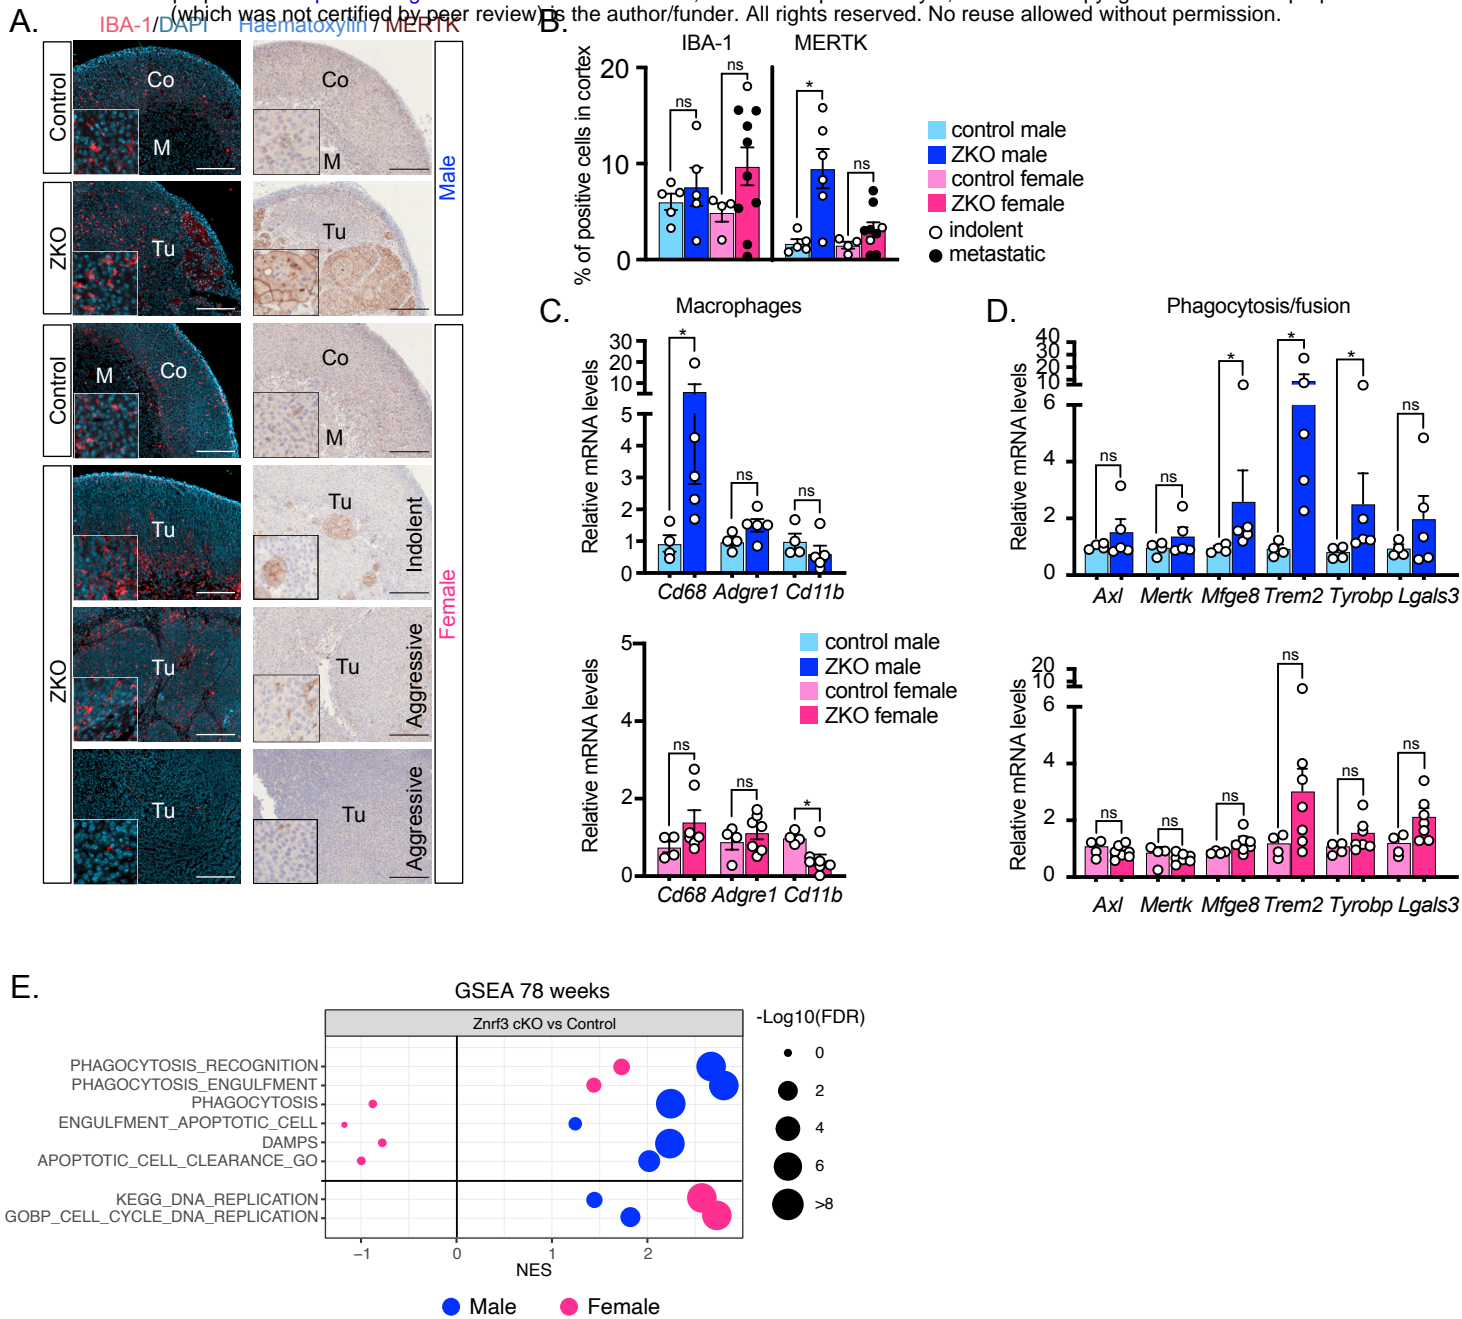

**Figure 7**

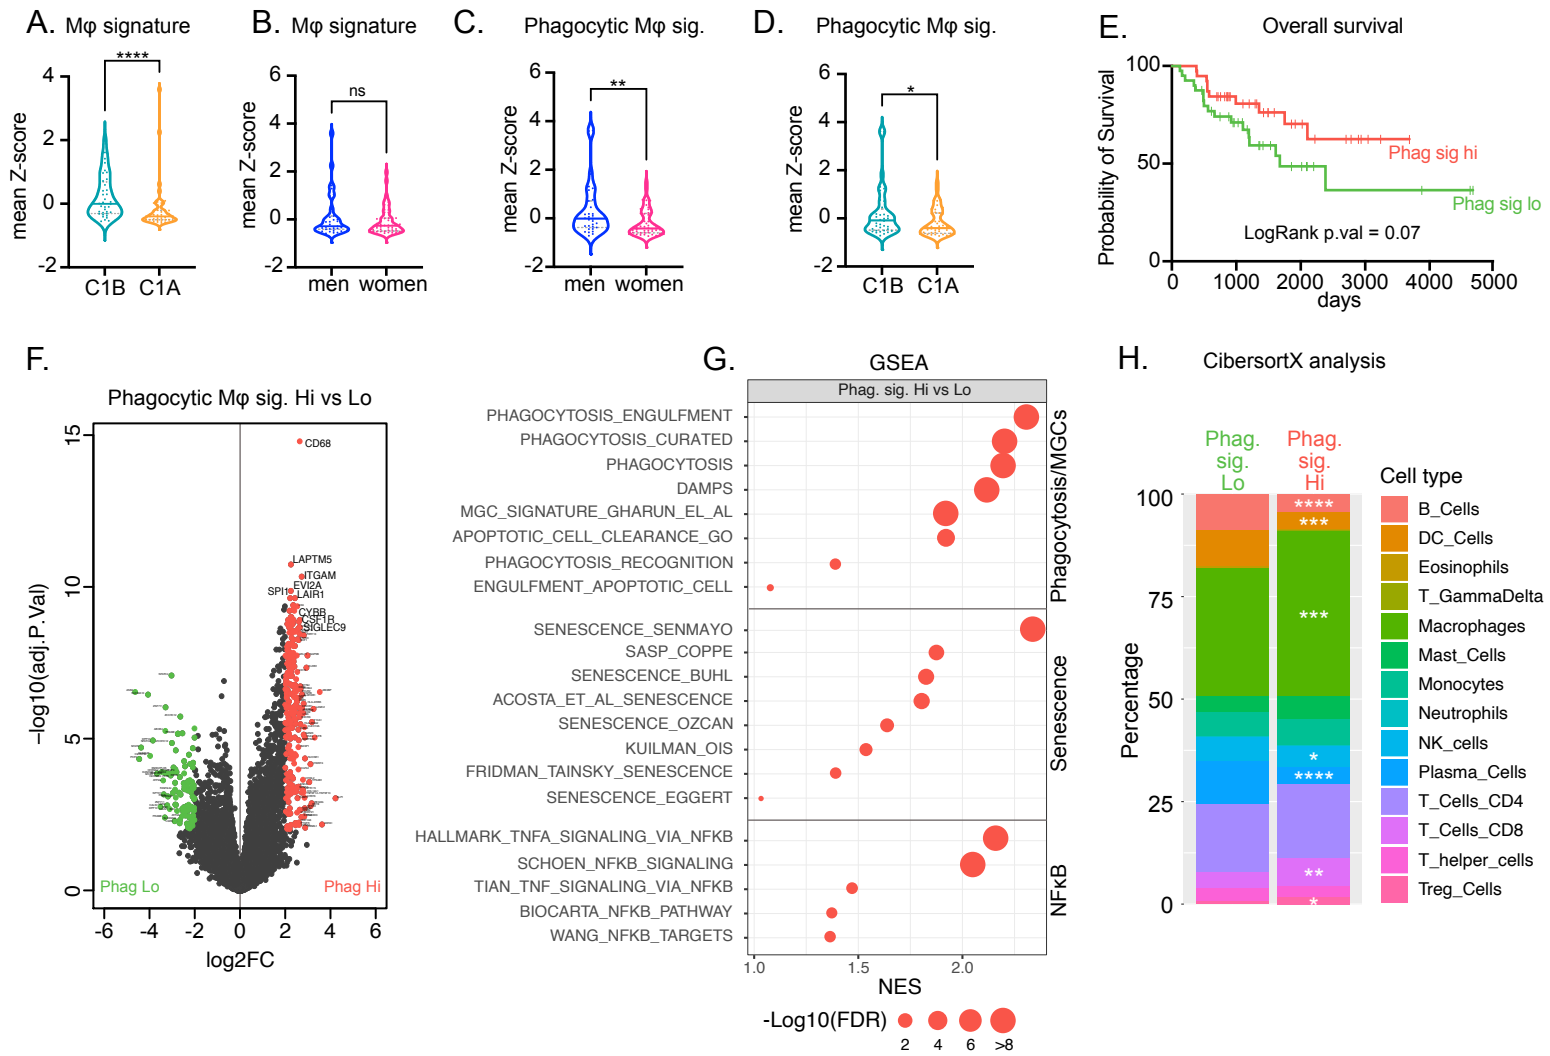

**Figure 8**
